## Genomic characterisation and conservation genetics of the indigenous Irish Kerry cattle breed

1 **Sam Browett<sup>1</sup>, Gillian McHugo<sup>2</sup>, Ian W. Richardson<sup>3</sup>, David A. Magee<sup>2</sup>, Stephen D. E. Park<sup>3</sup>,**  
2 **Alan G. Fahey<sup>2</sup>, John F. Kearney<sup>4</sup>, Carolina N. Correia<sup>2</sup>, Imtiaz A. S. Randhawa<sup>5</sup>, David E.**  
3 **MacHugh<sup>2, 6\*</sup>**

4 <sup>1</sup> Ecosystems and Environment Research Centre, School of Environment and Life Sciences,  
5 University of Salford, Salford, M5 4WT, United Kingdom.

6 <sup>2</sup> UCD School of Agriculture and Food Science, University College Dublin, Belfield, Dublin, D04  
7 V1W8, Ireland.

8 <sup>3</sup> IdentiGEN, Ltd., Block 2, Blackrock Office Park, Carysfort Avenue, Blackrock, Dublin, A94 H2X4,  
9 Ireland.

10 <sup>4</sup> Irish Cattle Breeding Federation, Highfield House, Bandon, Co. Cork, P72 X050, Ireland.

11 <sup>5</sup> Sydney School of Veterinary Science, The University of Sydney, Camden, 2570, NSW, Australia.

12 <sup>6</sup> UCD Conway Institute of Biomolecular and Biomedical Research, University College Dublin,  
13 Dublin, D04 V1W8, Ireland.

14

15 \* **Correspondence:** David E. MacHugh, Animal Genomics Laboratory, UCD School of  
16 Agriculture and Food Science, University College Dublin, Belfield, Dublin, D04 V1W8, Ireland.

17 Email: [david.machugh@ucd.ie](mailto:david.machugh@ucd.ie)

18 **Keywords:** cattle, conservation genomics, endangered breed, inbreeding, genetic diversity,  
19 population genomics, selection signature, SNP array.

20

21

22 **Note 1:** This is an Associate Editor (D.E.M) Inaugural Article submission to *Frontiers in Genetics:*  
23 *Livestock Genomics*

24 **Note 2:** British English language style preferred for publication of this article.

## Genomic characterisation of the Kerry cattle breed

### 25 **Abstract**

26 Kerry cattle are an endangered landrace heritage breed of cultural importance to Ireland. In the  
27 present study we have used genome-wide SNP data (Illumina® BovineSNP50 array) to evaluate  
28 genomic diversity within the Kerry cattle population and between Kerry cattle and other European  
29 cattle breeds. Visualisation of patterns of genetic differentiation and gene flow among cattle breeds  
30 using phylogenetic trees with ancestry graphs highlighted, in particular, historical gene flow from the  
31 British Shorthorn breed into the ancestral population of modern Kerry cattle. Principal component  
32 analysis (PCA) and genetic clustering emphasised the genetic distinctiveness of Kerry cattle relative  
33 to comparator British and European cattle breeds. Modelling of genetic effective population size ( $N_e$ )  
34 revealed a demographic trend of diminishing  $N_e$  over time and that recent estimated  $N_e$  values for the  
35 Kerry breed may be less than the threshold for sustainable genetic conservation. In addition, analysis  
36 of genome-wide autozygosity ( $F_{ROH}$ ) showed that genomic inbreeding has increased significantly  
37 during the 20 years between 1992 and 2012. Finally, signatures of selection revealed genomic regions  
38 subject to natural and artificial selection as Kerry cattle adapted to the climate, physical geography  
39 and agro-ecology of southwest Ireland.

40

### 41 **1. Introduction**

42 Approximately 10,000 years ago, humans first domesticated wild aurochs (*Bos primigenius*)—the  
43 progenitor of modern cattle—in the Fertile Crescent region of Southwest Asia (Edwards et al., 2010;  
44 Larson and Fuller, 2014; Larson et al., 2014; Park et al., 2015; MacHugh et al., 2017). Extant domestic  
45 cattle, which encompass humpless taurine (*B. taurus*), humped zebu (*B. indicus*) and myriad *B.*  
46 *taurus/indicus* hybrid populations, have, through genetic drift and natural and artificial selection,  
47 diversified into more than 1,100 recognised breeds. However, starting in the middle of the 20<sup>th</sup>  
48 century, socioeconomic preferences for large highly productive dairy, beef and dual-purpose breeds

## Genomic characterisation of the Kerry cattle breed

49 have led to extinction and increased vulnerability of more than 200 locally-adapted landrace or native  
50 cattle breeds (Gandini et al., 2004; Food and Agriculture Organization, 2007; 2015).

51 With the advent of accelerating climate change, particularly in the Arctic and circumarctic regions  
52 (Vihma, 2014; Gao et al., 2015), agro-ecological environments in north-western Europe will  
53 inevitably undergo significant change during the coming century (Smith and Gregory, 2013; Wheeler  
54 and von Braun, 2013). It is, therefore, increasingly recognised that long-term sustainability of animal  
55 production systems and food security will necessitate conservation and management of livestock  
56 genetic resources in this region (Hoffmann, 2010; Boettcher et al., 2015; Kantanen et al., 2015).  
57 Locally-adapted native livestock breeds with distinct microevolutionary histories and minimal  
58 external gene flow will have accumulated novel genomic variation and haplotype combinations for  
59 quantitative health, fertility and production traits (Hill, 2014; Feliuss et al., 2015; Kristensen et al.,  
60 2015). These populations may therefore be key to future breeding programmes directed towards  
61 adaptation of European livestock to new agro-ecological and production environments (Biscarini et  
62 al., 2015; Boettcher et al., 2015; Phocas et al., 2016a; b).

63 The availability of powerful and cheap tools for genotyping large numbers of single nucleotide  
64 polymorphisms (SNPs) has provided conservation biologists and animal geneticists with the  
65 opportunity to characterise genomic variation and estimate population genetic parameters at very high  
66 resolution in threatened or endangered livestock breeds (Pertoldi et al., 2014; Ben Jemaa et al., 2015;  
67 Beynon et al., 2015; Meszaros et al., 2015; Burren et al., 2016; Decker et al., 2016; Iso-Touru et al.,  
68 2016; Manunza et al., 2016; Mastrangelo et al., 2016; Visser et al., 2016; Williams et al., 2016;  
69 Francois et al., 2017). These studies are already providing important baseline data for genetic  
70 conservation and will underpin programmes for managed breeding and biobanking of these  
71 populations (Groeneveld et al., 2016).

72 As a native breed with a claimed ancient heritage, Kerry cattle are considered culturally important  
73 to Ireland (Curran, 1990). It is a landrace cattle population that remains productive in harsh upland

## Genomic characterisation of the Kerry cattle breed

74 regions with poor quality feed, which are typical of southwest Ireland where the Kerry breed evolved  
75 (Food and Agriculture Organization, 2017). These cattle were often referred to anecdotally in Ireland  
76 as the “poor man’s cow” due to their ability to produce relatively large quantities of milk on very  
77 sparse fodder; the Kerry breed is also considered to be a remnant of what was once a substantially  
78 larger and more widespread historical population. Levels of inbreeding have been estimated using  
79 pedigree data and the accumulated figure since the foundation of the herd book in 1887 reached 15%  
80 in 1985 (O’hUigín and Cunningham, 1990).

81 In recent decades the Kerry cattle breed has experienced significant population fluctuations due to  
82 changing socioeconomic and agricultural circumstances. During the 1980s, the number of breeding  
83 females decreased to less than 200, prompting the Irish agricultural authorities to introduce a Kerry  
84 cattle conservation scheme (McParland, 2013), which has continued to the present day in the form of  
85 the Department of Agriculture, Food and the Marine (DAFM) Kerry Cattle Premium Scheme  
86 (Department of Agriculture Food and the Marine, 2017).

87 The formal conservation policy and supports initiated during the early 1990s led to a significant  
88 increase in the Kerry cattle population, such that by 2007 the number of breeding females had  
89 increased to more than a thousand animals (Food and Agriculture Organization, 2017). In recent  
90 years, however, due to deteriorating economic circumstances in Ireland post-2008, the Kerry cattle  
91 population has substantially declined once again and is classified as endangered and under significant  
92 threat of extinction or absorption through crossbreeding with other breeds (McParland, 2013;  
93 Department of Agriculture Food and the Marine, 2014).

94 The Kerry cattle breed was one of the first European heritage cattle breeds to be surveyed using  
95 molecular population genetics techniques. We have previously used autosomal microsatellite genetic  
96 markers and mitochondrial DNA (mtDNA) control region sequence variation for comparative  
97 evolutionary studies of genetic diversity in Kerry cattle and other British, European, African and  
98 Asian breeds (MacHugh et al., 1997; MacHugh et al., 1998; MacHugh et al., 1999; Troy et al., 2001).

## Genomic characterisation of the Kerry cattle breed

99 In addition, Bray and colleagues have used microsatellites to examine admixture and ancestry in  
100 Kerry cattle and the Dexter and Devon breeds (Bray et al., 2009). Results from these studies  
101 demonstrated that Kerry cattle exhibit markedly low mtDNA sequence diversity, but autosomal  
102 microsatellite diversity comparable to other cattle breeds native to Britain and Ireland. More recently,  
103 analyses of medium- and high-density SNP genotypes generated using genome sequence data from  
104 an extinct British *B. primigenius* subfossil have shown that Kerry cattle retain a significant genomic  
105 signature of admixture from wild aurochs (Park et al., 2015; Upadhyay et al., 2017). This observation  
106 highlights the genetic distinctiveness of the Kerry population and has major implications for  
107 conservation and management of the breed.

108 For the present study, and within a genetic conservation framework, we performed high-resolution  
109 comparative population genomics analyses of Kerry cattle and a range of British and European cattle  
110 breeds. These analyses encompassed phylogenetic network reconstruction, evaluation of genetic  
111 structure and inbreeding, modelling of historical effective population sizes and functional analyses of  
112 artificial and natural selection across the Kerry genome.

113

## 114 2. Materials and Methods

### 115 2.1. Kerry Cattle Population DNA Sampling in 1991/92 and 2011/12

116 Two different population samples from the Irish Kerry cattle breed were used for this study  
117 (**Figure 1**). The first population sample consisted of peripheral blood and semen straw genomic DNA  
118 collected and purified from 36 male and female Kerry cattle in 1991/92, which are a subset of the  
119 Kerry cattle population sample ( $n = 40$ ) we have previously described and used for microsatellite-  
120 based population genetics analyses (MacHugh et al., 1997; MacHugh et al., 1998). Pedigree records  
121 and owners were consulted to ensure there was the minimum degree of genetic relatedness among  
122 the animals sampled. This Kerry population sample group is coded as KY92.

## Genomic characterisation of the Kerry cattle breed

123 The second Kerry cattle population sample was collected in 2011/12 from 19 different herds  
124 located across southern and western Ireland. Performagene (PG-100) nasal swab DNA collection kits  
125 were used for biological sample collection (DNA Genotek Inc., Ottawa, Canada). Nasal swab DNA  
126 samples were collected from a total of 75 male and female Kerry cattle and owners were consulted to  
127 ensure there was the minimum degree of genetic relatedness among the animals sampled. This Kerry  
128 population sample group is coded as KY12. Genomic DNA was purified from nasal swabs using the  
129 Promega Maxwell<sup>®</sup> 16 DNA automated DNA extraction platform (Promega UK, Southampton,  
130 United Kingdom) and established methods developed at the UCD Animal Genomics Laboratory  
131 (Magee et al., 2010; Magee et al., 2011).

### 132 2.2. SNP Genotyping and Assembly of Comparative SNP Data Sets

133 Illumina<sup>®</sup> Bovine SNP50 BeadChip (Matukumalli et al., 2009) genotyping on all 111 Kerry  
134 genomic DNA samples (KY92 and KY12 sample panels plus nine blinded sample duplicates for  
135 quality control purposes) was performed by Weatherbys Scientific (Co. Kildare, Ireland).

136 For comparative population genomics analyses, equivalent SNP data for a range of other breeds  
137 were obtained from previously published work (Decker et al., 2009; Flori et al., 2009; Gibbs et al.,  
138 2009; Matukumalli et al., 2009; Gautier et al., 2010; Park et al., 2015). The breed SNP data were split  
139 into two discrete composite data sets: a European breed SNP data set (EU) and a SNP data set for a  
140 subset of European breeds originating from Britain and Ireland (BI). A population sample of West  
141 African N'Dama *B. taurus* cattle from Guinea (NDAM) was also used as an outgroup for the  
142 phylogenetic analyses. **Table 1** provides detailed biogeographical information on the cattle breed  
143 samples used for the present study.

### 144 2.3. Sample Removal and Quality Control and Filtering of SNPs

145 Pedigree records and genomic relationship were used to identify animals from the KY92 and KY12  
146 population samples that were either parent-offspring pairs or full-sibs. One of the two animals in each  
147 pair was then randomly removed to generate the working SNP data set. Following this procedure,

## Genomic characterisation of the Kerry cattle breed

148 quality control and filtering based on recorded SNP genotypes was performed as detailed below for  
149 the EU and BI data sets.

150 Prior to quality control and filtering there were 54,057 SNPs in the EU data set (608 animals,  
151 including KY92 and KY12) and in the BI data set (354 animals, including KY92 and KY12). SNP  
152 quality filtering was performed using PLINK version 1.07 (Purcell et al., 2007), such that individual  
153 SNPs with more than 10% missing data and a minor allele frequency (MAF) of  $\leq 0.01$  were removed  
154 from both data sets. X and Y chromosome SNPs were removed and individual animal samples with  
155 a SNP call rate less than 90% were also removed from each of the two data sets.

156 SNP quality control and filtering were performed across breeds/populations (by data set) for  
157 construction of phylogenies and ancestor graphs, multivariate analysis, investigation of population  
158 structure and detection of signatures of selection. For intrapopulation analyses of effective population  
159 size ( $N_e$ ) and genomic inbreeding, all SNPs genotyped (54,057) were filtered within  
160 breeds/populations as detailed above. However, an additional filtering procedure was used to remove  
161 SNPs deviating from Hardy-Weinberg equilibrium (HWE) with a  $P$  value threshold of  $< 0.0001$ .  
162 Also, for the  $N_e$  analysis, a more stringent MAF threshold of 0.05 was used.

163 Using the filtered genome-wide SNP data, PLINK v1.07 was also used to generate identity-by-  
164 state (IBS) values between all pairs of Kerry cattle (KY92 and KY12), including the nine blinded  
165 sample duplicates for quality control purposes.

### 166 2.4. Construction of Phylogenetic Trees and Ancestry Graphs

167 Maximum likelihood (ML) phylogenetic trees with ancestry graphs were generated for the EU and  
168 BI data sets using the TreeMix (version 1.12) software package (Pickrell and Pritchard, 2012). The  
169 West African *B. taurus* NDAM breed sample ( $n = 22$ ) was used as an outgroup. TreeMix was run  
170 without using SNP blocks (as described in the TreeMix software documentation) and ML

## Genomic characterisation of the Kerry cattle breed

171 phylogenetic trees were generated with no migration edges ( $m = 0$ ) up to ten migration edges ( $m =$   
172 10).

### 173 2.5. Population Differentiation and Genetic Structure

174 To visualise the main axes of genomic variation among cattle breeds and individual animals,  
175 multivariate principal component analysis (PCA) was performed for the composite EU and BI SNP  
176 data sets using SMARTPCA from the EIGENSOFT package (version 4.2) with default settings  
177 (Patterson et al., 2006).

178 To further investigate genetic structure and admixture history for Kerry cattle and other breeds the  
179 fastSTRUCTURE software package (Raj et al., 2014) was used to analyse the EU and BI data sets  
180 for a range of  $K$  possible ancestral populations ( $K = 2-15$ ). For the present study, the simple prior  
181 approach described by Raj and colleagues (2014) was used, which is sufficient for modelling  
182 population/breed divergence. To identify the ‘true’  $K$  value for the number of ancestral populations,  
183 a series of fastSTRUCTURE runs with pre-defined  $K$  values were examined using the *chooseK.py*  
184 script (Raj et al., 2014). Outputs from the fastSTRUCTURE analyses were visualised using the  
185 DISTRUCT software program (Rosenberg et al., 2002) using standard parameters.

### 186 2.6. Modelling Current and Historical Effective Population Size ( $N_e$ )

187 Current and historical  $N_e$  trends were modelled with genome-wide SNP linkage disequilibrium  
188 (LD) data for the KY92 and KY12 populations plus a selection of BI and EU breeds using the SNeP  
189 software tool as described by Barbato and colleagues (Barbato et al., 2015). This method facilitates  
190 estimation of historical  $N_e$  values from SNP linkage disequilibrium (LD) data using the following  
191 equation (Corbin et al., 2012):

$$192 \quad N_{T(t)} = (4f(c_t))^{-1} \left( E[r_{adj}^2 | c_t]^{-1} - \alpha \right)$$

193 where  $N_T$  is the effective population size  $t$  generations ago calculated as  $t = (2f(c_t))^{-1}$  (Hayes et  
194 al., 2003),  $c_t$  is the recombination rate defined for a specific physical distance between SNP markers,



## Genomic characterisation of the Kerry cattle breed

195  $r_{adj}^2$  is the LD value adjusted for sample size and  $\alpha := \{1, 2, 2.2\}$  is a correction for the occurrence of  
196 mutation (Barbato et al., 2015). In addition, the SNeP program option for unphased SNP data was  
197 used for the analyses described here.

### 198 **2.7. Evaluation of Genomic Inbreeding and Runs of Homozygosity (ROH)**

199 Individual animal genomic inbreeding was evaluated as genome-wide autozygosity estimated from  
200 SNP data using runs of homozygosity (ROH) and the  $F_{ROH}$  statistic introduced by McQuillan and  
201 colleagues (2008). The  $F_{ROH}$  statistic was calculated as the ratio of the total length of defined runs of  
202 homozygosity ( $L_{ROH}$ ) to the total length of the autosomal genome covered by SNPs:

$$203 \quad F_{ROH} = \frac{\sum L_{ROH}}{L_{AUTO}}$$

204 PLINK v1.07 was used to define runs of homozygosity (ROH) using a sliding window approach  
205 and procedures modified from previous recommendations for Illumina<sup>®</sup> Bovine SNP50 BeadChip  
206 and similar SNP data sets (Purfield et al., 2012; Purfield et al., 2017). The criteria for defining  
207 individual ROH were set such that the ROH was required to be at least 500 kb in length, with a  
208 minimum density of one SNP per 120 kb and that there was a gap of at least 1,000 kb between each  
209 ROH. A sliding window of 50 SNPs was incrementally advanced one SNP at a time along the  
210 genome; each discrete window could contain a maximum of one heterozygous SNP and no more than  
211 two SNPs with missing genotypes. Following Purfield and colleagues all filtered genomic SNPs,  
212 including those located in centromeric regions, were used to estimate  $F_{ROH}$  values for individual  
213 animals.

### 214 **2.8. Genome-wide Detection of Signatures of Selection and Functional Enrichment Analysis**

215 In the absence of hard selective sweeps, single selection tests using high-density SNP data do not  
216 perform well in detecting signatures of selection from individual livestock breeds (Kemper et al.,  
217 2014). Therefore, for the present study, genomic signatures of selection were identified using the

## Genomic characterisation of the Kerry cattle breed

218 composite selection signal (CSS) method introduced by Randhawa and colleagues (Randhawa et al.,  
219 2014). The CSS method has been shown to be a robust and sensitive approach for detecting genomic  
220 signatures of selection underlying microevolution of complex traits in livestock (Randhawa et al.,  
221 2015). The CSS is a weighted index of signatures of selection from multiple estimates; it is a  
222 nonparametric procedure that uses fractional ranks of constituent tests and does not depend on  
223 assumptions about the distributions of individual test results.

224 As described in detail by Randhawa *et al.* (2014), the CSS method can be used to combine the  
225 fixation index ( $F_{ST}$ ), the change in selected allele frequency ( $\Delta SAF$ ) and the cross-population  
226 extended haplotype homozygosity ( $XP-EHH$ ) tests into one composite statistic for each SNP in a  
227 population genomics data set. For the present study, we used 36,621 genome-wide SNPs genotyped  
228 in 98 individual Kerry cattle samples (from both the KY92 and KY12 populations) and a sample of  
229 102 randomly selected cattle (six random cattle from each breed of the EU data set). To mitigate  
230 against false positives, genomic selection signatures were only considered significant if at least one  
231 SNP from the set of the top 0.1% genome-wide CSS scores was flanked by at least five SNPs from  
232 the set of the top 1% CSS scores.

233 The Ensembl BioMart data mining resource (Smedley et al., 2015) was used to identify genes  
234 within  $\pm 1.0$  Mb of each selection peak (Ensembl release 90, August 2017). Following this,  
235 Ingenuity<sup>®</sup> Pathway Analysis (IPA<sup>®</sup>: Qiagen, Redwood City, CA, USA; release date June 2017) was  
236 used to perform an overrepresentation enrichment analysis (ORA) with this gene set to identify  
237 canonical pathways and functional processes of biological importance. The total gene content of  
238 Ensembl release 90 version of the UMD3.1 bovine genome assembly (Zimin et al., 2009) was used  
239 as the most appropriate reference gene set for these analyses (Timmons et al., 2015).

240

241

## 242 3. Results and Discussion

### 243 3.1. Sample Removal and SNP Filtering and Quality Control

244 Inspection of the pedigree records and the genomic relationship matrix (based on identity-by-state  
245 [IBS] of SNP genotypes) identified 10 animals from the KY12 population that were members of a  
246 parent-offspring or full-sib pair (sample codes: KY12\_01, KY12\_05, KY12\_13, KY12\_14,  
247 KY12\_17, KY12\_18, KY12\_19, KY12\_46, KY12\_55, KY12\_67). One sample from each of these  
248 pairs was randomly removed. Thereafter, general SNP quality control and filtering led to additional  
249 samples being excluded (KY12\_26, KY12\_28 and KY12\_54), giving a total filtered KY12 population  
250 sample of 62 animals for downstream population genomics analyses.

251 After SNP quality control and filtering across the two composite data sets (EU and BI), there were  
252 36,621 autosomal SNPs from 605 individual animals in the EU data set and there were 37,395  
253 autosomal SNPs from 351 animals in the BI data set. When the West African NDAM breed sample  
254 ( $n = 22$ ) was included for the ML phylogenetic tree and ancestry graph analyses, the number of SNPs  
255 used was 36,000 from 627 animals for the EU data set and 37,490 from 373 animals for the BI data  
256 set. The final numbers of SNPs used for individual breed/population analyses of  $N_e$  and genomic  
257 inbreeding after all quality control and filtering (including additional filtering for deviations from  
258 HWE) are shown in **Table 2**.

259 All data sets, including EU and BI composite data sets and individual breed/population data sets  
260 had total SNP call rates of  $> 99\%$ . The IBS values estimated for Kerry cattle (KY92 and KY12) from  
261 filtered genome-wide SNP data are reported in Supplementary Table 1 and described further in  
262 **Section 3.7**.

### 263 3.2. Observed heterozygosity ( $H_o$ ) estimated from genome-wide SNP data

264 **Table 2** provides genome-wide  $H_o$  values for each of the breeds/populations used for the present  
265 study. The lowest genome-wide  $H_o$  value was observed for the West Africa NDAM *B. taurus* breed,  
266 which is likely a consequence of ascertainment bias introduced by a focus on polymorphic SNPs in

## Genomic characterisation of the Kerry cattle breed

267 European *B. taurus* during design of the Illumina® Bovine SNP50 BeadChip (Matukumalli et al.,  
268 2009).

269 Generally, as shown in **Table 2** for the EU and BI breeds and populations, local landrace or  
270 heritage breeds display lower  $H_o$  values compared to more widespread production breeds such as the  
271 Simmental (SIMM), Holstein (HOLS) or Charolais (CHAR) breeds. In addition, as might be  
272 expected, production breeds originally derived from minor island populations (Jersey [JRSY] and  
273 Guernsey [GNSY]) also exhibit relatively low  $H_o$  values. In the context of genetic conservation it is  
274 therefore encouraging that the KY92 and KY12 population samples display intermediate  $H_o$  values  
275 that are at the upper end of the range observed for the heritage breeds.

### 276 3.3. Maximum Likelihood Phylogenetic Ancestry Graphs using Genome-wide SNP Data

277 To examine microevolutionary patterns of genetic differentiation and gene flow among cattle  
278 breeds and populations, ML phylogenetic ancestry graphs were generated using TreeMix. For the EU  
279 data set, the ML tree topology was consistent for all values of  $m$ , with the exception of  $m = 2$  migration  
280 edges, where the Hereford breed (HRFD) was observed to group with the HOLS breed. The ML tree  
281 generated with  $m = 5$  is shown in **Figure 2**, which highlights the genetic similarity of the Northern  
282 European breeds (British, Irish and Scandinavian). As expected the two Kerry population samples  
283 (KY92 and KY12) are genetically very similar and emerge on the same branch as the HRFD breed.  
284 It is also noteworthy that there is a high-weight migration edge between the British Shorthorn breed  
285 (BSHN) and the root of the two Kerry population samples, supporting the hypothesis of historical  
286 gene flow from the British Shorthorn breed into the ancestral population of modern Kerry cattle  
287 (Curran, 1990).

288 For the ML trees generated using the BI data set, breed/population differentiation was less  
289 apparent, possibly due to similar biogeographical origins for these breeds and/or smaller sample sizes  
290 for some of the populations sampled. **Figure 3** shows the ML tree generated with  $m = 5$  for the BI  
291 data set. For  $m = 5$ , all migration edges stem from the BSHN/Lincoln Red (LNCR) branch, including

## Genomic characterisation of the Kerry cattle breed

292 a medium-weight migration edge connecting to the Kerry cattle branch. These results support the  
293 hypothesis that there was significant gene flow during the 18<sup>th</sup> and 19<sup>th</sup> centuries from British  
294 Shorthorn cattle into the ancestral populations for a range of modern British and Irish cattle breeds  
295 (Grobet et al., 1998; Felius et al., 2011; Felius et al., 2015).

### 296 3.4. Multivariate Principal Component Analysis of Genome-wide SNP Data

297 To investigate inter- and intra-population genomic diversity and genetic relationship among  
298 individual animals from multiple cattle breeds and populations, PCA was performed using genome-  
299 wide SNP data. Principal component plots of the first (PC1) and second (PC2) principal components  
300 are shown in **Figures 4** and **5** for the EU and BI data sets, respectively.

301 In **Figure 4**, for the EU data set, PC1 and PC2 account for 18.2% and 16.8% of the total variation  
302 for PC1–10, respectively. The PC1 plot axis differentiates the British Angus (ANGU), Red Angus  
303 (RANG) and BSHN and Irish KY92 and KY12 populations from the rest of the European breeds,  
304 including the British HRFD and GNSY and JRSY Channel Islands breeds. In addition, the ANGU  
305 and RANG and the Kerry (KY92 and KY12) emerge at the opposite extremes of the PC2 plot axis,  
306 highlighting the genetic distinctiveness of the Kerry breed and supporting their status as an important  
307 cattle genetic resource that should be prioritised for conservation.

308 In **Figure 5**, for the BI data set, PC1 and PC2 account for 23.7% and 22.7% of the total variation  
309 for PC1–10, respectively. The PC1 plot axis recapitulates PC2 in **Figure 4** and differentiates the  
310 Kerry (KY92 and KY12) from the ANGU and RANG breeds with the other British breeds emerging  
311 between these two extremes. This result reiterates the genetic distinctiveness of the Kerry cattle breed  
312 in comparison to a wide range of British production and heritage landrace cattle breeds, again  
313 emphasising the need for genetic conservation.

314 The PC2 plot axis in **Figure 5** differentiates the HRFD breed from the other British and Irish  
315 breeds and reveals substantial genetic diversity among individual HRFD animals. However, in this

## Genomic characterisation of the Kerry cattle breed

316 context, it is important to note that the pattern of genetic diversity revealed here for the HRFD  
317 population sample may be due to ascertainment bias as a consequence of the strategy used to design  
318 the Illumina® Bovine SNP50 BeadChip. In this regard, many of the SNPs that constitute this first-  
319 generation SNP array were identified from heterozygous positions in the inbred Hereford female (L1  
320 Dominette 01449) bovine genome assembly or through comparisons of random shotgun reads from  
321 six diverse cattle breeds that were aligned directly to the same Hereford genome assembly  
322 (Matukumalli et al., 2009). This approach to SNP array design will inevitably lead to elevated  
323 intrabreed genomic variation using the Illumina® Bovine SNP50 BeadChip with Hereford cattle  
324 (Meuwissen, 2009) and accounts for the dispersed pattern of individual HRFD samples in **Figure 5**.

325 Examination of **Figures 4 and 5** indicates that two of the KY12 animals sampled may exhibit a  
326 genetic signature of ancestral crossbreeding with another cattle population, which, anecdotally, is  
327 likely to have been due to crossbreeding with Angus cattle. Therefore, another PCA plot was  
328 generated (Supplementary Figure 1) that shows PC1 and PC2 for individual animals from the KY92,  
329 KY12, ANGU and RANG population samples. The two animals exhibiting a genetic signature of  
330 possible ancestral crossbreeding (KY12\_06 and KY12\_58) are indicated on Supplementary Figure 1.  
331 Under the assumption of crossbreeding with ANGU cattle, the positions of KY12\_06 and KY12\_58  
332 on this PC plot would suggest that these animals are third generation ( $F_3$ ) or greater backcrosses.  
333 Notwithstanding the KY12\_06 and KY12\_58 data points, the genetic similarity among all Kerry  
334 cattle sampled is evident by comparison of the tight KY92 and KY12 sample cluster to the dispersion  
335 of the ANGU and RANG samples on the PCA plot in Supplementary Figure 1.

### 336 **3.5. Analysis of Genetic Structure using Genome-wide SNP data**

337 The results of the fastSTRUCTURE analyses using the EU and BI data sets are shown in **Figure**  
338 **6 and Figure 7**, respectively. For both analyses, the Kerry cattle (KY92 and KY12) cluster as a single  
339 group at  $K = 2$  and are differentiated from all other European or British and Irish cattle breeds. The  
340 other breed group that is clearly differentiated at  $K = 2$  in **Figure 7** is the cluster composed of the

## Genomic characterisation of the Kerry cattle breed

341 ANGU and RANG breeds. These results mirror the pattern shown for PC1 in **Figure 5**, and again  
342 emphasise the genetic distinctiveness of Kerry cattle compared to other European production and  
343 landrace heritage breeds. Using the *chooseK.py* script the ‘true’ number of clusters corresponding to  
344 the likely number of ancestral populations was estimated to be between 12 and 14 for the EU data set  
345 and either 7 or 8 for the BI data set.

346 For both data sets, animals from the KY12 population sample appear to be more genetically  
347 homogenous compared to the KY92 population sample. This observation may be a consequence of  
348 increasing use, since the early 1990s, of small numbers of artificial insemination (AI) Kerry sires. It  
349 is also noteworthy that the two individual animals detected with a substantial signature of putative  
350 historical crossbreeding (KY12\_06 and KY12\_58) show marked patterns of population admixture in  
351 the fastSTRUCTURE results, which are indicated by red arrows in **Figure 6** and **Figure 7**.

### 352 **3.6. Modelling Historical Effective Population Size ( $N_e$ ) using Genome-wide SNP Data**

353 The results from modelling historical  $N_e$  in a selection of production and heritage cattle breeds and  
354 populations (KY92, KY12, DXTR, BSHN, BGAL, LNCR, ANGU, JRSY and HOLS) are provided  
355 in Supplementary Table 2 and visualised in **Figure 8**. The ‘demographic fingerprints’ (Barbato et al.,  
356 2015) of the two Kerry populations shown in **Figure 8** and tabulated in Supplementary Table 2 are  
357 more similar to those of the production breeds with large census populations (BSHN, ANGU, JRSY,  
358 HOLS) than the other heritage breeds with relatively small census population sizes (DXTR, BGAL,  
359 LNCR). The KY92, KY12, BSHN, ANGU, JRSY and HOLS populations show a declining trend  
360 from historical  $N_e$  peaks between 1,500 and 2,000 more than 900 generations ago to  $N_e$  values  
361 estimated to be less than 200 within the last 20 generations. On the other hand, the DXTR, BSHN,  
362 BGAL and LNCR populations display a more severe decline from historical  $N_e$  peaks between 2,500  
363 and 4,000 more than 900 generations ago to  $N_e$  values estimated to be less than 150 within the last 20  
364 generations.

## Genomic characterisation of the Kerry cattle breed

365 It is important to keep in mind these  $N_e$  trends may be partly a consequence of the relatively small  
366 sample sizes for the DXTR, BGAL and LNCR breeds (see **Table 2**), coupled with different histories  
367 of migration, gene flow and, in particular, strong artificial selection in the production cattle  
368 populations. Notwithstanding these caveats, the most recent modelled  $N_e$  values for the KY92 and  
369 KY12 population samples are 89 and 88, respectively. These values are  $N_e$  estimates for 12  
370 generations in the past and assuming a generation interval of between 4 to 6 years, which is based on  
371 a pedigree estimate from a similar heritage cattle population of 5.66 (Meszaros et al., 2015), this  
372 corresponds to between 48 and 72 years before 2012 (for the KY12 population). This is approximately  
373 the period between 1940 and 1965, which is during the time that the Kerry breed started to decline  
374 precipitously in census population size and also  $N_e$  estimated from herd book data (O'hUigín and  
375 Cunningham, 1990; Food and Agriculture Organization, 2017).

376 From a conservation perspective, livestock populations generally exhibit  $N_e$  values relative to total  
377 census population sizes ( $N_c$ ) that are substantially lower than seen in comparable wild mammal  
378 populations (Hall, 2016). Also, estimation of  $N_e$  using methods such as SNeP that leverage genome-  
379 wide SNP linkage disequilibrium (LD) data will tend to underestimate  $N_e$  because of physical linkage  
380 between many of the SNPs in the data set (Waples et al., 2016). Nevertheless, taking this into account,  
381 there is still cause for concern that the most recent  $N_e$  values modelled for the KY92 and KY12  
382 population samples are below the critical  $N_e$  threshold of 100 recommended by Meuwissen (2009)  
383 for long-term viability of discrete livestock breeds and populations.

### 384 **3.7. Genomic Relationship and Analysis of Inbreeding**

385 Supplementary Table 1 shows a genomic relationship matrix in terms of genotype IBS for the  
386 genome-wide SNP data generated for individual animals in the KY92 and KY12 population samples.  
387 Close genomic relationship between individual animals sampled from the same herd is evident in the  
388 SNP genotype IBS values between samples. In addition, the relatively low genomic relationship  
389 between the KY12\_06 and KY12\_58 outlier samples (**Figures 4–7**) and the rest of the Kerry cattle



## Genomic characterisation of the Kerry cattle breed

390 sampled is also evident in Supplementary Table 1. These data emphasise the value of intrapopulation  
391 genomic relationship values for identifying animals that, from a conservation genetics standpoint,  
392 should be of lower priority. They also highlight the potential of genome-wide SNP data for providing  
393 a systematic approach to prioritising males and females with minimum genomic relationship for  
394 breeding to minimize loss of genetic diversity and maintain or increase  $N_e$  (Gandini et al., 2004;  
395 Meuwissen, 2009; de Cara et al., 2011; de Cara et al., 2013).

396 Genome-wide autozygosity estimated from SNP data using runs of homozygosity (ROH) and the  
397  $F_{ROH}$  statistic are visualised in **Figure 9** for individual animals from the KY92 and KY12 population  
398 samples and a range of European comparator breeds. Additional summary ROH data is provided in  
399 Supplementary Table 3 and also Supplementary Figure 2, which reveals marked inter-population  
400 differences in ROH length and demonstrates that the SNP density of the Illumina® Bovine SNP50  
401 BeadChip is too low to reliably capture ROH below 5 Mb in length, an observation previously  
402 reported by Purfield and colleagues (2012).

403 There is significant variation in  $F_{ROH}$  values among individual animals and between breeds and  
404 populations. The non-parametric Wilcoxon rank sum test was performed on  $F_{ROH}$  distributions for all  
405 pairwise population/breed comparisons with application of the Bonferroni correction  $P$  value  
406 adjustment for multiple statistical tests (Supplementary Table 4). This analysis demonstrated that the  
407 KY12 population sample exhibited a significantly higher mean  $F_{ROH}$  value than the KY92 population  
408 sample ( $P_{adjust} = 0.0340$ ). This is important from a conservation genetics perspective, indicating that  
409 genome-wide autozygosity, which is highly correlated with conventional pedigree-based estimates of  
410 inbreeding ( $F_{PED}$ ) for cattle (Purfield et al., 2012; Ferenčaković et al., 2013; Martikainen et al., 2017),  
411 has increased for the Kerry cattle population in the 20 years between sampling of the KY92 and KY12  
412 populations.

413 The importance of understanding and quantifying genome-wide autozygosity for genetic  
414 conservation purposes has recently been highlighted through correlation of  $F_{ROH}$  with inbreeding

## Genomic characterisation of the Kerry cattle breed

415 depression for a range of production traits in domestic cattle (Bjelland et al., 2013; Pryce et al., 2014;  
416 Kim et al., 2015). Importantly,  $F_{ROH}$  has also been shown to correlate with inbreeding depression for  
417 bovine fertility traits in both males (Ferencakovic et al., 2017) and females (Kim et al., 2015;  
418 Martikainen et al., 2017). Finally, according to basic population genetic principles, recent inbreeding  
419 captured by  $F_{ROH}$  will lead to recessive deleterious genomic variants emerging at a population level—  
420 a phenomenon that has been studied in both humans and cattle (Szpiech et al., 2013; Zhang et al.,  
421 2015).

### 422 3.8. Genome-wide Signatures of Selection in the Kerry Cattle Breed

423 The results of the genome-wide scan for signatures of selection using the CSS method in the Kerry  
424 cattle breed are shown in **Figure 10**. Six distinct selection signatures were detected on BTA9, BTA12,  
425 BTA16, BTA17, BTA19 and BTA28. A total of 178 genes were located within the genomic ranges  
426  $\pm 1.0$  Mb of selection peaks and 32 of these genes were located within the boundaries of a selection  
427 peak. Supplementary Table 5 provides detailed information for these 178 genes.

428 A single gene was located within the BTA9 selection peak—the phosphodiesterase 7B gene  
429 (*PDE7B*), which has been associated with neurobiological processes (de Gortari and Mengod, 2010)  
430 and has been previously linked to genetic changes associated with dog (*Canis lupus familiaris*)  
431 domestication and behaviour (Freedman et al., 2016). A single gene was also located within the  
432 BTA16 selection peak—the dorsal inhibitory axon guidance protein gene (*DRAXIN*), which encodes  
433 a protein that regulates axon guidance, neural circuit formation and vertebrate brain development  
434 (Islam et al., 2009; Shinmyo et al., 2015). Twenty-four genes were located within the BTA17  
435 selection peak, including *BICDL1*, *RAB35* and *RNF10*, which have been associated with  
436 neurobiology and brain development (Hoshikawa et al., 2008; Schlager et al., 2010; Villarroel-  
437 Campos et al., 2016) and *SIRT4* and *COQ5* that function in cellular metabolism (Kawamukai, 2015;  
438 Elkhwanky and Hakkola, 2017). Six genes were located within the BTA28 selection peak, including,  
439 most notably, the Rho GTPase activating protein 22 gene (*ARHGAP22*), which has recently been

## Genomic characterisation of the Kerry cattle breed

440 associated with bovine fertility as an mRNA expression biomarker for oocyte competence in cumulus  
441 cells (Melo et al., 2017).

442 To obtain a broader perspective on natural and artificial selection acting at a population level on  
443 the Kerry cattle genome, a functional gene set enrichment approach (GSEA) was taken using IPA  
444 with the 178 genes located within  $\pm 1.0$  Mb of each selection peak (Supplementary Table 5). Of these  
445 178 genes, 141 could be mapped to the IPA knowledgebase and the summary results for the IPA  
446 *Physiological System Development and Function* category are shown in Supplementary Table 6,  
447 revealing an enrichment of biological processes associated with nervous system development and  
448 behaviour.

### 449 **3.9. Genomics, Genetic Distinctiveness and Microevolution of Kerry Cattle: Implications for** 450 **Breed Management and Genetic Conservation**

451 The genome-wide phylogenetic and population genetic analyses detailed here demonstrate that  
452 Kerry cattle represent an important farm animal genetic resource, befitting the breed's status as a  
453 livestock population with a unique history of adaptation to the climate and physical geography of  
454 southwest Ireland at the edge of Western Europe. Notably, from a genetic conservation and breed  
455 management perspective, high-resolution comparative PCA (**Figures 4 and 5**) and genetic clustering  
456 results (**Figures 6 and 7**) demonstrate that Kerry cattle are markedly distinct from other British and  
457 European cattle populations. This observation may also be placed in the context of recent  
458 paleogenomic studies that have detected ancient gene flow from wild British aurochs (*B. primigenius*)  
459 into the ancestors of present-day Kerry cattle (Orlando, 2015; Park et al., 2015; Upadhyay et al.,  
460 2017).

461 The current genetic status of the Kerry cattle population is underlined by analyses of genetic  
462 effective population size ( $N_e$ ) and inbreeding using genome-wide SNP data. As shown in **Table 2**,  
463 genome-wide observed heterozygosity ( $H_o$ ) is relatively high in the KY92 and K12 population  
464 samples, particularly for endangered heritage cattle breeds. However, it has been long recognised that

## Genomic characterisation of the Kerry cattle breed

465 monitoring  $N_e$  is a more important tool for rational breed management and long-term conservation of  
466 endangered livestock populations (Notter, 1999; Gandini et al., 2004; Biscarini et al., 2015). As  
467 shown in **Figure 8** and Supplementary Table 2, the Kerry cattle population has a recent demographic  
468 trend of  $N_e$  decline, to the point where the most recent modelled  $N_e$  values are below the recommended  
469 threshold for sustainable breed management and conservation (Meuwissen, 2009). There is also cause  
470 for concern that genomic inbreeding estimated using genome-wide autozygosity ( $F_{ROH}$ ) and  
471 visualised in **Figure 9** has increased significantly in the 20-year period between the sampling of the  
472 KY92 and KY12 Kerry cattle populations.

473 In a more positive light, as shown in the present study, detection of discrete signatures of selection  
474 using the relatively low-density Illumina<sup>®</sup> Bovine SNP50 BeadChip is encouraging for wider studies  
475 of genome-wide microevolution in endangered heritage livestock populations. Based on our results,  
476 for example, future surveys of Kerry cattle that use higher-density SNP array platforms and ultimately  
477 whole-genome sequence data will provide exquisitely detailed information on the genomic regions  
478 and associated polygenic production, health, fertility and behavioural traits shaped, over many  
479 centuries, by the agro-ecology and pre-industrial farming systems of southwest Ireland.

480

### 481 **4. Conflict of Interest**

482 The authors declare that the research was conducted in the absence of any commercial or financial  
483 relationships that could be construed as a potential conflict of interest.

484

### 485 **5. Ethics Statement**

486 With the exception of Kerry cattle sampled during 2011-12, all samples and data was obtained  
487 from previously published scientific studies. The re-use of these samples and data is consistent with  
488 the 3Rs principles on replacement, refinement and reduction of animals in research

## Genomic characterisation of the Kerry cattle breed

489 ([www.nc3rs.org.uk/the-3rs](http://www.nc3rs.org.uk/the-3rs)). For the 2011-12 Kerry cattle, population owners' consent to sample  
490 DNA for research was obtained and individual owners conducted sampling of animals using non-  
491 invasive nasal swabs. In this regard, scientific animal protection in Ireland is subject to European  
492 Union Directive 2010/63/EU, which states that the Directive does not apply to “practices not likely  
493 to cause pain, suffering, distress or lasting harm equivalent to, or higher than, that caused by the  
494 introduction of a needle in accordance with good veterinary practice”.

495

### 496 **6. Author Contributions**

497 DEM, DAM, AGF and JFK conceived and designed the project; DEM, IWR, DAM, AGF and JFK  
498 organised sample collection and genotyping; SB, GM, IWR, DAM, SDEP, CNC, IASR and DEM  
499 performed the analyses; SB and DEM wrote the manuscript and all authors reviewed and approved  
500 the final manuscript.

501

### 502 **7. Funding**

503 This work was supported by Department of Agriculture, Food and the Marine (DAFM) funding  
504 under the Genetic Resources for Food and Agriculture scheme (grant no: 10/GR/06); an Investigator  
505 Programme Grant from Science Foundation Ireland (SFI/08/IN.1/B2038); a Research Stimulus Grant  
506 from DAFM (RSF 06 406); a European Union Framework 7 Project Grant (KBBE-211602-  
507 MACROSYS); the Brazilian Science Without Borders Programme (CAPES grant no. BEX-13070-  
508 13-4) and the UCD MSc Programme in Evolutionary Biology.

509

### 510 **8. Acknowledgements**

511 The authors wish to express their gratitude to the Kerry Cattle Society ([www.kerrycattle.ie](http://www.kerrycattle.ie)) for  
512 facilitating and encouraging this project. In particular, we thank Rosemary and Jeremy Hill, Matthew

### **Genomic characterisation of the Kerry cattle breed**

513 English Hayden and the Irish Cattle Breeding Federation (ICBF – [www.icbf.com](http://www.icbf.com)) for expert guidance  
514 and assistance with animal sourcing and DNA sampling. We are also grateful to Professor Dan  
515 Bradley (Smurfit Institute of Genetics, Trinity College Dublin) for access to DNA sample archives.  
516 In addition, we thank all of the Kerry cattle owners who provided access to animals, samples and  
517 pedigree information. Finally, we thank Weatherbys Scientific for provision of SNP array genotyping  
518 services ([www.weatherbysscientific.com](http://www.weatherbysscientific.com)).

519 **9. References**

- 520 Barbato, M, Orozco-terWengel, P, Tapio, M, and Bruford, MW (2015). SNeP: a tool to estimate  
521 trends in recent effective population size trajectories using genome-wide SNP data. *Front*  
522 *Genet* 6, 109. doi: 10.3389/fgene.2015.00109.
- 523 Ben Jemaa, S, Boussaha, M, Ben Mehdi, M, Lee, JH, and Lee, SH (2015). Genome-wide insights  
524 into population structure and genetic history of Tunisian local cattle using the Illumina  
525 BovineSNP50 Beadchip. *BMC Genomics* 16, 677. doi: 10.1186/s12864-015-1638-6.
- 526 Beynon, SE, Slavov, GT, Farre, M, Sunduimijid, B, Waddams, K, Davies, B, Haresign, W, Kijas, J,  
527 MacLeod, IM, Newbold, CJ, Davies, L, and Larkin, DM (2015). Population structure and  
528 history of the Welsh sheep breeds determined by whole genome genotyping. *BMC Genet* 16,  
529 65. doi: 10.1186/s12863-015-0216-x.
- 530 Biscarini, F, Nicolazzi, EL, Stella, A, Boettcher, PJ, and Gandini, G (2015). Challenges and  
531 opportunities in genetic improvement of local livestock breeds. *Front Genet* 6, 33. doi:  
532 10.3389/fgene.2015.00033.
- 533 Bjelland, DW, Weigel, KA, Vukasinovic, N, and Nkrumah, JD (2013). Evaluation of inbreeding  
534 depression in Holstein cattle using whole-genome SNP markers and alternative measures of  
535 genomic inbreeding. *J Dairy Sci* 96, 4697-4706. doi: 10.3168/jds.2012-6435.
- 536 Boettcher, PJ, Hoffmann, I, Baumung, R, Drucker, AG, McManus, C, Berg, P, Stella, A, Nilsen,  
537 LB, Moran, D, Naves, M, and Thompson, MC (2015). Genetic resources and genomics for  
538 adaptation of livestock to climate change. *Front Genet* 5, 461. doi:  
539 10.3389/fgene.2014.00461.
- 540 Bray, TC, Chikhi, L, Sheppy, AJ, and Bruford, MW (2009). The population genetic effects of  
541 ancestry and admixture in a subdivided cattle breed. *Anim Genet* 40, 393-400. doi:  
542 10.1111/j.1365-2052.2009.01850.x.
- 543 Burren, A, Neuditschko, M, Signer-Hasler, H, Frischknecht, M, Reber, I, Menzi, F, Drogemuller, C,  
544 and Flury, C (2016). Genetic diversity analyses reveal first insights into breed-specific  
545 selection signatures within Swiss goat breeds. *Anim Genet* 47, 727-739. doi:  
546 10.1111/age.12476.
- 547 Corbin, LJ, Liu, AYH, Bishop, SC, and Woolliams, JA (2012). Estimation of historical effective  
548 population size using linkage disequilibria with marker data. *J Anim Breed Genet* 129, 257-  
549 270. doi: 10.1111/j.1439-0388.2012.01003.x.
- 550 Curran, PL (1990). *Kerry and Dexter Cattle and other Ancient Irish Breeds, a History*. Dublin,  
551 Ireland: Royal Dublin Society.

## Genomic characterisation of the Kerry cattle breed

- 552 de Cara, MA, Fernandez, J, Toro, MA, and Villanueva, B (2011). Using genome-wide information  
553 to minimize the loss of diversity in conservation programmes. *J Anim Breed Genet* 128,  
554 456-464. doi: 10.1111/j.1439-0388.2011.00971.x.
- 555 de Cara, MA, Villanueva, B, Toro, MA, and Fernandez, J (2013). Using genomic tools to maintain  
556 diversity and fitness in conservation programmes. *Mol Ecol* 22, 6091-6099. doi:  
557 10.1111/mec.12560.
- 558 de Gortari, P, and Mengod, G (2010). Dopamine D1, D2 and mu-opioid receptors are co-expressed  
559 with adenylyl cyclase 5 and phosphodiesterase 7B mRNAs in striatal rat cells. *Brain Res*  
560 1310, 37-45. doi: 10.1016/j.brainres.2009.11.009.
- 561 Decker, JE, Pires, JC, Conant, GC, McKay, SD, Heaton, MP, Chen, K, Cooper, A, Vilkki, J,  
562 Seabury, CM, Caetano, AR, Johnson, GS, Brenneman, RA, Hanotte, O, Eggert, LS, Wiener,  
563 P, Kim, JJ, Kim, KS, Sonstegard, TS, Van Tassell, CP, Neiberghs, HL, McEwan, JC,  
564 Brauning, R, Coutinho, LL, Babar, ME, Wilson, GA, McClure, MC, Rolf, MM, Kim, J,  
565 Schnabel, RD, and Taylor, JF (2009). Resolving the evolution of extant and extinct  
566 ruminants with high-throughput phylogenomics. *Proc Natl Acad Sci U S A* 106, 18644-  
567 18649. doi: 10.1073/pnas.0904691106.
- 568 Decker, JE, Taylor, JF, Kantanen, J, Millbrooke, A, Schnabel, RD, Alexander, LJ, and MacNeil,  
569 MD (2016). Origins of cattle on Chirikof Island, Alaska, elucidated from genome-wide SNP  
570 genotypes. *Heredity* 116, 502-505. doi: 10.1038/hdy.2016.7.
- 571 Department of Agriculture Food and the Marine (2014). *State of Biodiversity for Food and*  
572 *Agriculture in Ireland*. Dublin, Ireland: Department of Agriculture, Food and the Marine.
- 573 Department of Agriculture Food and the Marine. 2017. Kerry Cattle Premium Scheme: Scheme  
574 Objectives and Terms and Conditions.
- 575 Edwards, CJ, Magee, DA, Park, SD, McGettigan, PA, Lohan, AJ, Murphy, A, Finlay, EK, Shapiro,  
576 B, Chamberlain, AT, Richards, MB, Bradley, DG, Loftus, BJ, and MacHugh, DE (2010). A  
577 complete mitochondrial genome sequence from a mesolithic wild aurochs (*Bos*  
578 *primigenius*). *PLoS ONE* 5, e9255. doi: 10.1371/journal.pone.0009255.
- 579 Elkhwanky, MS, and Hakkola, J (2017). Extranuclear sirtuins and metabolic stress. *Antioxid Redox*  
580 *Signal*. doi: 10.1089/ars.2017.7270.
- 581 Felius, M, Koolmees, PA, Theunissen, B, Consortium, ECGD, and Lenstra, JA (2011). On the  
582 breeds of cattle—historic and current classifications. *Diversity* 3, 660.
- 583 Felius, M, Theunissen, B, and Lenstra, JA (2015). Conservation of cattle genetic resources: the role  
584 of breeds. *J Agric Sci* 153, 152-162. doi: 10.1017/s0021859614000124.



## Genomic characterisation of the Kerry cattle breed

- 585 Ferenčaković, M, Hamzić, E, Gredler, B, Solberg, TR, Klemetsdal, G, Curik, I, and Sölkner, J  
586 (2013). Estimates of autozygosity derived from runs of homozygosity: empirical evidence  
587 from selected cattle populations. *J Anim Breed Genet* 130, 286-293. doi: 10.1111/jbg.12012.
- 588 Ferenčaković, M, Sölkner, J, Kaps, M, and Curik, I (2017). Genome-wide mapping and estimation  
589 of inbreeding depression of semen quality traits in a cattle population. *J Dairy Sci* 100,  
590 4721-4730. doi: 10.3168/jds.2016-12164.
- 591 Flori, L, Fritz, S, Jaffrezic, F, Boussaha, M, Gut, I, Heath, S, Foulley, JL, and Gautier, M (2009).  
592 The genome response to artificial selection: a case study in dairy cattle. *PLoS ONE* 4, 13.  
593 doi: 10.1371/journal.pone.0006595.
- 594 Food and Agriculture Organization (2007). *The State of the World's Animal Genetic Resources for*  
595 *Food and Agriculture*. Rome, Italy: edited by D. Pilling & B. Rischkowsky. FAO  
596 Commission on Genetic Resources for Food and Agriculture Assessments.
- 597 Food and Agriculture Organization (2015). *The Second Report on the State of the World's Animal*  
598 *Genetic Resources for Food and Agriculture*. Rome, Italy: edited by B.D. Scherf & D.  
599 Pilling. FAO Commission on Genetic Resources for Food and Agriculture Assessments.
- 600 Food and Agriculture Organization. 2017. Domestic Animal Diversity Information System (DAD-  
601 IS); available at: [www.fao.org/dadis](http://www.fao.org/dadis). [Accessed 01/05/2017].
- 602 Francois, L, Wijnrocx, K, Colinet, FG, Gengler, N, Hulsege, B, Windig, JJ, Buys, N, and Janssens,  
603 S (2017). Genomics of a revived breed: case study of the Belgian Campine cattle. *PLoS*  
604 *ONE* 12, e0175916. doi: 10.1371/journal.pone.0175916.
- 605 Freedman, AH, Schweizer, RM, Ortega-Del Vecchyo, D, Han, E, Davis, BW, Gronau, I, Silva, PM,  
606 Galaverni, M, Fan, Z, Marx, P, Lorente-Galdos, B, Ramirez, O, Hormozdiari, F, Alkan, C,  
607 Vila, C, Squire, K, Geffen, E, Kusak, J, Boyko, AR, Parker, HG, Lee, C, Tadisotla, V,  
608 Siepel, A, Bustamante, CD, Harkins, TT, Nelson, SF, Marques-Bonet, T, Ostrander, EA,  
609 Wayne, RK, and Novembre, J (2016). Demographically-based evaluation of genomic  
610 regions under selection in domestic dogs. *PLoS Genet* 12, e1005851. doi:  
611 10.1371/journal.pgen.1005851.
- 612 Gandini, GC, Ollivier, L, Danell, B, Distl, O, Georgoudis, A, Groeneveld, E, Martyniuk, E, van  
613 Arendonk, JAM, and Woolliams, JA (2004). Criteria to assess the degree of endangerment  
614 of livestock breeds in Europe. *Livestock Prod Sci* 91, 173-182. doi:  
615 <http://dx.doi.org/10.1016/j.livprodsci.2004.08.001>.
- 616 Gao, Y, Sun, J, Li, F, He, S, Sandven, S, Yan, Q, Zhang, Z, Lohmann, K, Keenlyside, N, Furevik,  
617 T, and Suo, L (2015). Arctic sea ice and Eurasian climate: A review. *Adv Atmos Sci* 32, 92-  
618 114. doi: 10.1007/s00376-014-0009-6.

## Genomic characterisation of the Kerry cattle breed

- 619 Gautier, M, Laloe, D, and Moazami-Goudarzi, K (2010). Insights into the genetic history of French  
620 cattle from dense SNP data on 47 worldwide breeds. *PLoS ONE* 5. doi:  
621 10.1371/journal.pone.0013038.
- 622 Gibbs, RA, Taylor, JF, Van Tassell, CP, Barendse, W, Eversoe, KA, Gill, CA, Green, RD,  
623 Hamernik, DL, Kappes, SM, Lien, S, Matukumalli, LK, McEwan, JC, Nazareth, LV,  
624 Schnabel, RD, Taylor, JF, Weinstock, GM, Wheeler, DA, Ajmone-Marsan, P, Barendse, W,  
625 Boettcher, PJ, Caetano, AR, Garcia, JF, Hanotte, O, Mariani, P, Skow, LC, Williams, JL,  
626 Caetano, AR, Diallo, B, Green, RD, Hailemariam, L, Hanotte, O, Martinez, ML, Morris,  
627 CA, Silva, LOC, Spelman, RJ, Taylor, JF, Mulatu, W, Zhao, KY, Abbey, CA, Agaba, M,  
628 Araujo, FR, Bunch, RJ, Burton, J, Gill, CA, Gorni, C, Olivier, H, Harrison, BE, Luff, B,  
629 Machado, MA, Mariani, P, Morris, CA, Mwakaya, J, Plastow, G, Sim, W, Skow, LC, Smith,  
630 T, Sonstegard, TS, Spelman, RJ, Taylor, JF, Thomas, MB, Valentini, A, Williams, P,  
631 Womack, J, Wooliams, JA, Liu, Y, Qin, X, Worley, KC, Gao, C, Gill, CA, Jiang, HY, Liu,  
632 Y, Moore, SS, Nazareth, LV, Ren, YR, Song, XZ, Bustamante, CD, Hernandez, RD,  
633 Muzny, DM, Nazareth, LV, Patil, S, Lucas, AS, Fu, Q, Kent, MP, Moore, SS, Vega, R,  
634 Abbey, CA, Gao, C, Gill, CA, Green, RD, Matukumalli, LK, Matukumalli, A, McWilliam,  
635 S, Schnabel, RD, Sclep, G, Ajmone-Marsan, P, Bryc, K, Bustamante, CD, Choi, J, Gao, H,  
636 Grefenstette, JJ, et al. (2009). Genome-wide survey of SNP variation uncovers the genetic  
637 structure of cattle breeds. *Science* 324, 528-532. doi: 10.1126/science.1167936.
- 638 Grobet, L, Poncelet, D, Royo, LJ, Brouwers, B, Pirottin, D, Michaux, C, Menissier, F, Zanotti, M,  
639 Dunner, S, and Georges, M (1998). Molecular definition of an allelic series of mutations  
640 disrupting the myostatin function and causing double-muscling in cattle. *Mamm Genome* 9,  
641 210-213.
- 642 Groeneveld, LF, Gregusson, S, Guldbbrandtsen, B, Hiemstra, SJ, Hveem, K, Kantanen, J, Lohi, H,  
643 Stroemstedt, L, and Berg, P (2016). Domesticated animal biobanking: land of opportunity.  
644 *PLoS Biol* 14, e1002523. doi: 10.1371/journal.pbio.1002523.
- 645 Hall, SJ (2016). Effective population sizes in cattle, sheep, horses, pigs and goats estimated from  
646 census and herdbook data. *Animal* 10, 1778-1785. doi: 10.1017/s1751731116000914.
- 647 Hayes, BJ, Visscher, PM, McPartlan, HC, and Goddard, ME (2003). Novel multilocus measure of  
648 linkage disequilibrium to estimate past effective population size. *Genome Res* 13, 635-643.  
649 doi: 10.1101/gr.387103.
- 650 Hill, WG (2014). Applications of population genetics to animal breeding, from Wright, Fisher and  
651 Lush to genomic prediction. *Genetics* 196, 1-16. doi: 10.1534/genetics.112.147850.
- 652 Hoffmann, I (2010). Climate change and the characterization, breeding and conservation of animal  
653 genetic resources. *Anim Genet* 41 Suppl 1, 32-46. doi: 10.1111/j.1365-2052.2010.02043.x.

## Genomic characterisation of the Kerry cattle breed

- 654 Hoshikawa, S, Ogata, T, Fujiwara, S, Nakamura, K, and Tanaka, S (2008). A novel function of  
655 RING finger protein 10 in transcriptional regulation of the myelin-associated glycoprotein  
656 gene and myelin formation in Schwann cells. *PLoS ONE* 3, e3464. doi:  
657 10.1371/journal.pone.0003464.
- 658 Islam, SM, Shinmyo, Y, Okafuji, T, Su, Y, Naser, IB, Ahmed, G, Zhang, S, Chen, S, Ohta, K,  
659 Kiyonari, H, Abe, T, Tanaka, S, Nishinakamura, R, Terashima, T, Kitamura, T, and Tanaka,  
660 H (2009). Draxin, a repulsive guidance protein for spinal cord and forebrain commissures.  
661 *Science* 323, 388-393. doi: 10.1126/science.1165187.
- 662 Iso-Touru, T, Tapio, M, Vilkki, J, Kiseleva, T, Ammosov, I, Ivanova, Z, Popov, R, Ozerov, M, and  
663 Kantanen, J (2016). Genetic diversity and genomic signatures of selection among cattle  
664 breeds from Siberia, eastern and northern Europe. *Anim Genet* 47, 647-657. doi:  
665 10.1111/age.12473.
- 666 Kantanen, J, Lovendahl, P, Strandberg, E, Eythorsdottir, E, Li, MH, Kettunen-Präebel, A, Berg, P,  
667 and Meuwissen, T (2015). Utilization of farm animal genetic resources in a changing agro-  
668 ecological environment in the Nordic countries. *Front Genet* 6, 52. doi:  
669 10.3389/fgene.2015.00052.
- 670 Kawamukai, M (2015). Biosynthesis of coenzyme Q in eukaryotes. *Biosci Biotechnol Biochem* 80,  
671 23-33. doi: 10.1080/09168451.2015.1065172.
- 672 Kemper, KE, Saxton, SJ, Bolormaa, S, Hayes, BJ, and Goddard, ME (2014). Selection for complex  
673 traits leaves little or no classic signatures of selection. *BMC Genomics* 15, 246. doi:  
674 10.1186/1471-2164-15-246.
- 675 Kim, ES, Sonstegard, TS, Van Tassell, CP, Wiggans, G, and Rothschild, MF (2015). The  
676 relationship between runs of homozygosity and inbreeding in Jersey cattle under selection.  
677 *PLoS ONE* 10, e0129967. doi: 10.1371/journal.pone.0129967.
- 678 Kristensen, TN, Hoffmann, AA, Pertoldi, C, and Stronen, AV (2015). What can livestock breeders  
679 learn from conservation genetics and vice versa? *Front Genet* 6, 38. doi:  
680 10.3389/fgene.2015.00038.
- 681 Larson, G, and Fuller, DQ (2014). The evolution of animal domestication. *Annu Rev Ecol Evol Syst*  
682 45, 115-136. doi: 10.1146/annurev-ecolsys-110512-135813.
- 683 Larson, G, Piperno, DR, Allaby, RG, Purugganan, MD, Andersson, L, Arroyo-Kalin, M, Barton, L,  
684 Climer Vigueira, C, Denham, T, Dobney, K, Doust, AN, Gepts, P, Gilbert, MT, Gremillion,  
685 KJ, Lucas, L, Lukens, L, Marshall, FB, Olsen, KM, Pires, JC, Richerson, PJ, Rubio de  
686 Casas, R, Sanjur, OI, Thomas, MG, and Fuller, DQ (2014). Current perspectives and the  
687 future of domestication studies. *Proc Natl Acad Sci U S A* 111, 6139-6146. doi:  
688 10.1073/pnas.1323964111.

## Genomic characterisation of the Kerry cattle breed

- 689 MacHugh, DE, Larson, G, and Orlando, L (2017). Taming the past: ancient DNA and the study of  
690 animal domestication. *Annu Rev Anim Biosci* 5, 329-351. doi: 10.1146/annurev-animal-  
691 022516-022747.
- 692 MacHugh, DE, Loftus, RT, Cunningham, P, and Bradley, DG (1998). Genetic structure of seven  
693 European cattle breeds assessed using 20 microsatellite markers. *Anim Genet* 29, 333-340.  
694 doi: 10.1046/j.1365-2052.1998.295330.x.
- 695 MacHugh, DE, Shriver, MD, Loftus, RT, Cunningham, P, and Bradley, DG (1997). Microsatellite  
696 DNA variation and the evolution, domestication and phylogeography of taurine and zebu  
697 cattle (*Bos taurus* and *Bos indicus*). *Genetics* 146, 1071-1086.
- 698 MacHugh, DE, Troy, CS, McCormick, F, Olsaker, I, Eythorsdottir, E, and Bradley, DG (1999).  
699 Early medieval cattle remains from a Scandinavian settlement in Dublin: genetic analysis  
700 and comparison with extant breeds. *Philos Trans R Soc Lond B Biol Sci* 354, 99-108. doi:  
701 10.1098/rstb.1999.0363.
- 702 Magee, DA, Berkowicz, EW, Sikora, KM, Berry, DP, Park, SDE, Kelly, AK, Sweeney, T, Kenny,  
703 DA, Evans, RD, Wickham, BW, Spillane, C, and MacHugh, DE (2010). A catalogue of  
704 validated single nucleotide polymorphisms in bovine orthologs of mammalian imprinted  
705 genes and associations with beef production traits. *Animal* 4, 1958-1970. doi:  
706 doi:10.1017/S1751731110001163.
- 707 Magee, DA, Berry, DP, Berkowicz, EW, Sikora, KM, Howard, DJ, Mullen, MP, Evans, RD,  
708 Spillane, C, and MacHugh, DE (2011). Single nucleotide polymorphisms within the bovine  
709 *DLK1-DIO3* imprinted domain are associated with economically important production traits  
710 in cattle. *J Hered* 102, 94-101. doi: 10.1093/jhered/esq097.
- 711 Manunza, A, Cardoso, TF, Noce, A, Martinez, A, Pons, A, Bermejo, LA, Landi, V, Sanchez, A,  
712 Jordana, J, Delgado, JV, Adan, S, Capote, J, Vidal, O, Ugarte, E, Arranz, JJ, Calvo, JH,  
713 Casellas, J, and Amills, M (2016). Population structure of eleven Spanish ovine breeds and  
714 detection of selective sweeps with BayeScan and hapFLK. *Sci Rep* 6, 27296. doi:  
715 10.1038/srep27296.
- 716 Martikainen, K, Tyriseva, AM, Matilainen, K, Poso, J, and Uimari, P (2017). Estimation of  
717 inbreeding depression on female fertility in the Finnish Ayrshire population. *J Anim Breed*  
718 *Genet*. doi: 10.1111/jbg.12285.
- 719 Mastrangelo, S, Tolone, M, Di Gerlando, R, Fontanesi, L, Sardina, MT, and Portolano, B (2016).  
720 Genomic inbreeding estimation in small populations: evaluation of runs of homozygosity in  
721 three local dairy cattle breeds. *Animal* 10, 746-754. doi: 10.1017/s1751731115002943.
- 722 Matukumalli, LK, Lawley, CT, Schnabel, RD, Taylor, JF, Allan, MF, Heaton, MP, O'Connell, J,  
723 Moore, SS, Smith, TPL, Sonstegard, TS, and Van Tassell, CP (2009). Development and

## Genomic characterisation of the Kerry cattle breed

- 724 characterization of a high density SNP genotyping assay for cattle. *PLoS ONE* 4, 13. doi:  
725 10.1371/journal.pone.0005350.
- 726 McParland, S. 2013. National Genetic Conservation Strategy Document. Available:  
727 <https://www.agriculture.gov.ie>.
- 728 McQuillan, R, Leutenegger, AL, Abdel-Rahman, R, Franklin, CS, Pericic, M, Barac-Lauc, L,  
729 Smolej-Narancic, N, Janicijevic, B, Polasek, O, Tenesa, A, Macleod, AK, Farrington, SM,  
730 Rudan, P, Hayward, C, Vitart, V, Rudan, I, Wild, SH, Dunlop, MG, Wright, AF, Campbell,  
731 H, and Wilson, JF (2008). Runs of homozygosity in European populations. *Am J Hum Genet*  
732 83, 359-372. doi: 10.1016/j.ajhg.2008.08.007.
- 733 Melo, EO, Cordeiro, DM, Pellegrino, R, Wei, Z, Daye, ZJ, Nishimura, RC, and Dode, MA (2017).  
734 Identification of molecular markers for oocyte competence in bovine cumulus cells. *Anim*  
735 *Genet* 48, 19-29. doi: 10.1111/age.12496.
- 736 Meszaros, G, Boison, SA, Perez O'Brien, AM, Ferencakovic, M, Curik, I, Da Silva, MV,  
737 Utsunomiya, YT, Garcia, JF, and Solkner, J (2015). Genomic analysis for managing small  
738 and endangered populations: a case study in Tyrol Grey cattle. *Front Genet* 6, 173. doi:  
739 10.3389/fgene.2015.00173.
- 740 Meuwissen, T (2009). Genetic management of small populations: A review. *Acta Agriculturae*  
741 *Scandinavica, Section A — Animal Science* 59, 71-79. doi: 10.1080/09064700903118148.
- 742 Notter, DR (1999). The importance of genetic diversity in livestock populations of the future. *J*  
743 *Anim Sci* 77, 61-69.
- 744 O'hUigín, C, and Cunningham, EP (1990). Analysis of breeding structure of the Kerry breed. *J*  
745 *Anim Breed Genet* 107, 452-457. doi: 10.1111/j.1439-0388.1990.tb00057.x.
- 746 Orlando, L (2015). The first aurochs genome reveals the breeding history of British and European  
747 cattle. *Genome Biol* 16, 225. doi: 10.1186/s13059-015-0793-z.
- 748 Park, SD, Magee, DA, McGettigan, PA, Teasdale, MD, Edwards, CJ, Lohan, AJ, Murphy, A,  
749 Braud, M, Donoghue, MT, Liu, Y, Chamberlain, AT, Rue-Albrecht, K, Schroeder, S,  
750 Spillane, C, Tai, S, Bradley, DG, Sonstegard, TS, Loftus, BJ, and MacHugh, DE (2015).  
751 Genome sequencing of the extinct Eurasian wild aurochs, *Bos primigenius*, illuminates the  
752 phylogeography and evolution of cattle. *Genome Biol* 16, 234. doi: 10.1186/s13059-015-  
753 0790-2.
- 754 Patterson, N, Price, AL, and Reich, D (2006). Population structure and eigenanalysis. *PLoS Genet*  
755 2, e190. doi: 10.1371/journal.pgen.0020190.
- 756 Pertoldi, C, Purfield, DC, Berg, P, Jensen, TH, Bach, OS, Vingborg, R, and Kristensen, TN (2014).  
757 Genetic characterization of a herd of the endangered Danish Jutland cattle. *J Anim Sci* 92,  
758 2372-2376. doi: 10.2527/jas.2013-7206.

## Genomic characterisation of the Kerry cattle breed

- 759 Phocas, F, Belloc, C, Bidanel, J, Delaby, L, Dourmad, JY, Dumont, B, Ezanno, P, Fortun-Lamothe,  
760 L, Foucras, G, Frappat, B, Gonzalez-Garcia, E, Hazard, D, Larzul, C, Lubac, S, Mignon-  
761 Grasteau, S, Moreno, CR, Tixier-Boichard, M, and Brochard, M (2016a). Review: Towards  
762 the agroecological management of ruminants, pigs and poultry through the development of  
763 sustainable breeding programmes. II. Breeding strategies. *Animal* 10, 1760-1769. doi:  
764 10.1017/s1751731116001051.
- 765 Phocas, F, Belloc, C, Bidanel, J, Delaby, L, Dourmad, JY, Dumont, B, Ezanno, P, Fortun-Lamothe,  
766 L, Foucras, G, Frappat, B, Gonzalez-Garcia, E, Hazard, D, Larzul, C, Lubac, S, Mignon-  
767 Grasteau, S, Moreno, CR, Tixier-Boichard, M, and Brochard, M (2016b). Review: Towards  
768 the agroecological management of ruminants, pigs and poultry through the development of  
769 sustainable breeding programmes: I-selection goals and criteria. *Animal* 10, 1749-1759. doi:  
770 10.1017/s1751731116000926.
- 771 Pickrell, JK, and Pritchard, JK (2012). Inference of population splits and mixtures from genome-  
772 wide allele frequency data. *PLoS Genet* 8, e1002967. doi: 10.1371/journal.pgen.1002967.
- 773 Pryce, JE, Haile-Mariam, M, Goddard, ME, and Hayes, BJ (2014). Identification of genomic  
774 regions associated with inbreeding depression in Holstein and Jersey dairy cattle. *Genet Sel*  
775 *Evol* 46, 71. doi: 10.1186/s12711-014-0071-7.
- 776 Purcell, S, Neale, B, Todd-Brown, K, Thomas, L, Ferreira, MAR, Bender, D, Maller, J, Sklar, P, de  
777 Bakker, PIW, Daly, MJ, and Sham, PC (2007). PLINK: A tool set for whole-genome  
778 association and population-based linkage analyses. *Am J Hum Genet* 81, 559-575. doi:  
779 10.1086/519795.
- 780 Purfield, DC, Berry, DP, McParland, S, and Bradley, DG (2012). Runs of homozygosity and  
781 population history in cattle. *BMC Genet* 13, 70. doi: 10.1186/1471-2156-13-70.
- 782 Purfield, DC, McParland, S, Wall, E, and Berry, DP (2017). The distribution of runs of  
783 homozygosity and selection signatures in six commercial meat sheep breeds. *PLoS ONE* 12,  
784 e0176780. doi: 10.1371/journal.pone.0176780.
- 785 Raj, A, Stephens, M, and Pritchard, JK (2014). fastSTRUCTURE: variational inference of  
786 population structure in large SNP data sets. *Genetics* 197, 573-589. doi:  
787 10.1534/genetics.114.164350.
- 788 Randhawa, IA, Khatkar, MS, Thomson, PC, and Raadsma, HW (2014). Composite selection signals  
789 can localize the trait specific genomic regions in multi-breed populations of cattle and sheep.  
790 *BMC Genet* 15, 34. doi: 10.1186/1471-2156-15-34.
- 791 Randhawa, IA, Khatkar, MS, Thomson, PC, and Raadsma, HW (2015). Composite selection signals  
792 for complex traits exemplified through bovine stature using multibreed cohorts of European  
793 and African *Bos taurus*. *G3 (Bethesda)* 5, 1391-1401. doi: 10.1534/g3.115.017772.

## Genomic characterisation of the Kerry cattle breed

- 794 Rosenberg, NA, Pritchard, JK, Weber, JL, Cann, HM, Kidd, KK, Zhivotovsky, LA, and Feldman,  
795 MW (2002). Genetic structure of human populations. *Science* 298, 2381-2385. doi:  
796 10.1126/science.1078311.
- 797 Schlager, MA, Kapitein, LC, Grigoriev, I, Burzynski, GM, Wulf, PS, Keijzer, N, de Graaff, E,  
798 Fukuda, M, Shepherd, IT, Akhmanova, A, and Hoogenraad, CC (2010). Pericentrosomal  
799 targeting of Rab6 secretory vesicles by Bicaudal-D-related protein 1 (BICDR-1) regulates  
800 neuritogenesis. *EMBO J* 29, 1637-1651. doi: 10.1038/emboj.2010.51.
- 801 Shinmyo, Y, Asrafuzzaman Riyadh, M, Ahmed, G, Bin Naser, I, Hossain, M, Takebayashi, H,  
802 Kawasaki, H, Ohta, K, and Tanaka, H (2015). Draxin from neocortical neurons controls the  
803 guidance of thalamocortical projections into the neocortex. *Nat Commun* 6, 10232. doi:  
804 10.1038/ncomms10232.
- 805 Smedley, D, Haider, S, Durinck, S, Pandini, L, Provero, P, Allen, J, Arnaiz, O, Awedh, MH,  
806 Baldock, R, Barbiera, G, Bardou, P, Beck, T, Blake, A, Bonierbale, M, Brookes, AJ, Bucci,  
807 G, Buetti, I, Burge, S, Cabau, C, Carlson, JW, Chelala, C, Chrysostomou, C, Cittaro, D,  
808 Collin, O, Cordova, R, Cutts, RJ, Dassi, E, Di Genova, A, Djari, A, Esposito, A, Estrella, H,  
809 Eyra, E, Fernandez-Banet, J, Forbes, S, Free, RC, Fujisawa, T, Gadaleta, E, Garcia-  
810 Manteiga, JM, Goodstein, D, Gray, K, Guerra-Assuncao, JA, Haggarty, B, Han, DJ, Han,  
811 BW, Harris, T, Harshbarger, J, Hastings, RK, Hayes, RD, Hoede, C, Hu, S, Hu, ZL,  
812 Hutchins, L, Kan, Z, Kawaji, H, Keliet, A, Kerhornou, A, Kim, S, Kinsella, R, Klopp, C,  
813 Kong, L, Lawson, D, Lazarevic, D, Lee, JH, Letellier, T, Li, CY, Lio, P, Liu, CJ, Luo, J,  
814 Maass, A, Mariette, J, Maurel, T, Merella, S, Mohamed, AM, Moreews, F, Nabihoudine, I,  
815 Ndegwa, N, Noiro, C, Perez-Llamas, C, Primig, M, Quattrone, A, Quesneville, H,  
816 Rambaldi, D, Reecy, J, Riba, M, Rosanoff, S, Saddiq, AA, Salas, E, Sallou, O, Shepherd, R,  
817 Simon, R, Sperling, L, Spooner, W, Staines, DM, Steinbach, D, Stone, K, Stupka, E,  
818 Teague, JW, Dayem Ullah, AZ, Wang, J, Ware, D, et al. (2015). The BioMart community  
819 portal: an innovative alternative to large, centralized data repositories. *Nucleic Acids Res* 43,  
820 W589-598. doi: 10.1093/nar/gkv350.
- 821 Smith, P, and Gregory, PJ (2013). Climate change and sustainable food production. *Proc Nutr Soc*  
822 72, 21-28. doi: 10.1017/s0029665112002832.
- 823 Szpiech, ZA, Xu, J, Pemberton, TJ, Peng, W, Zollner, S, Rosenberg, NA, and Li, JZ (2013). Long  
824 runs of homozygosity are enriched for deleterious variation. *Am J Hum Genet* 93, 90-102.  
825 doi: 10.1016/j.ajhg.2013.05.003.
- 826 Timmons, JA, Szkop, KJ, and Gallagher, IJ (2015). Multiple sources of bias confound functional  
827 enrichment analysis of global -omics data. *Genome Biol* 16, 186. doi: 10.1186/s13059-015-  
828 0761-7.

## Genomic characterisation of the Kerry cattle breed

- 829 Troy, CS, MacHugh, DE, Bailey, JF, Magee, DA, Loftus, RT, Cunningham, P, Chamberlain, AT,  
830 Sykes, BC, and Bradley, DG (2001). Genetic evidence for Near-Eastern origins of European  
831 cattle. *Nature* 410, 1088-1091. doi: 10.1038/35074088.
- 832 Upadhyay, MR, Chen, W, Lenstra, JA, Goderie, CR, MacHugh, DE, Park, SD, Magee, DA,  
833 Matassino, D, Ciani, F, Megens, HJ, van Arendonk, JA, Groenen, MA, European Cattle  
834 Genetic Diversity, C, and Crooijmans, R (2017). Genetic origin, admixture and population  
835 history of aurochs (*Bos primigenius*) and primitive European cattle. *Heredity (Edinb)* 118,  
836 169-176. doi: 10.1038/hdy.2016.79.
- 837 Vihma, T (2014). Effects of Arctic sea ice decline on weather and climate: a review. *Surveys in*  
838 *Geophysics* 35, 1175-1214. doi: 10.1007/s10712-014-9284-0.
- 839 Villarroel-Campos, D, Henriquez, DR, Bodaleo, FJ, Oguchi, ME, Bronfman, FC, Fukuda, M, and  
840 Gonzalez-Billault, C (2016). Rab35 functions in axon elongation are regulated by P53-  
841 related protein kinase in a mechanism that involves Rab35 protein degradation and the  
842 microtubule-associated protein 1B. *J Neurosci* 36, 7298-7313. doi: 10.1523/jneurosci.4064-  
843 15.2016.
- 844 Visser, C, Lashmar, SF, Van Marle-Koster, E, Poli, MA, and Allain, D (2016). Genetic diversity  
845 and population structure in South African, French and Argentinian Angora goats from  
846 genome-wide SNP data. *PLoS ONE* 11, e0154353. doi: 10.1371/journal.pone.0154353.
- 847 Waples, RK, Larson, WA, and Waples, RS (2016). Estimating contemporary effective population  
848 size in non-model species using linkage disequilibrium across thousands of loci. *Heredity*  
849 *(Edinb)* 117, 233-240. doi: 10.1038/hdy.2016.60.
- 850 Wheeler, T, and von Braun, J (2013). Climate change impacts on global food security. *Science* 341,  
851 508-513. doi: 10.1126/science.1239402.
- 852 Williams, JL, Hall, SJ, Del Corvo, M, Ballingall, KT, Colli, L, Ajmone Marsan, P, and Biscarini, F  
853 (2016). Inbreeding and purging at the genomic level: the Chillingham cattle reveal  
854 extensive, non-random SNP heterozygosity. *Anim Genet* 47, 19-27. doi: 10.1111/age.12376.
- 855 Zhang, Q, Guldbbrandtsen, B, Bosse, M, Lund, MS, and Sahana, G (2015). Runs of homozygosity  
856 and distribution of functional variants in the cattle genome. *BMC Genomics* 16, 542. doi:  
857 10.1186/s12864-015-1715-x.
- 858 Zimin, AV, Delcher, AL, Florea, L, Kelley, DR, Schatz, MC, Puiu, D, Hanrahan, F, Pertea, G, Van  
859 Tassell, CP, Sonstegard, TS, Marçais, G, Roberts, M, Subramanian, P, Yorke, JA, and  
860 Salzberg, SL (2009). A whole-genome assembly of the domestic cow, *Bos taurus*. *Genome*  
861 *Biol* 10, R42. doi: gb-2009-10-4-r42 [pii]  
862 10.1186/gb-2009-10-4-r42.



863 **10. Figures**

864  
865 **FIGURE 1** | Photograph of a Kerry cow and locations of Kerry cattle herd DNA sampling in southern  
866 Ireland. The area of each circle corresponds to the size of each population sample. Dark green =  
867 animals sampled during 1991/92 (KY92); light green = animals sampled during 2011/12 (KY12).  
868 Kerry cow image is copyright of the Kerry Cattle Society Ltd.

869 **FIGURE 2** | Maximum likelihood (ML) phylogenetic tree network graph with five migration edges  
870 ( $m = 5$ ) generated for genome-wide SNP data (36,000 autosomal SNPs) from European cattle breeds  
871 (EU data set). The West African taurine N'Dama breed sampled in Guinea is included as a population  
872 outgroup. Coloured lines and arrows show migration edges that model gene flow between lineages  
873 with different migration weights represented by the colour gradient.

874 **FIGURE 3** | Maximum likelihood (ML) phylogenetic tree network graph with five migration edges  
875 ( $m = 5$ ) generated for genome-wide SNP data (37,490 autosomal SNPs) from cattle breeds of British  
876 and Irish origin (BI data set). The West African taurine N'Dama breed sampled in Guinea is included  
877 as a population outgroup. Coloured lines and arrows show migration edges that model gene flow  
878 between lineages with different migration weights represented by the colour gradient.

879 **FIGURE 4** | Principal component analysis plot constructed for PC1 and PC2 from genome-wide SNP  
880 data (36,621 autosomal SNPs) for the EU data set of 605 individual animals. The smaller histogram  
881 plot shows the relative variance contributions for the first 10 PCs.

882 **FIGURE 5** | Principal component analysis plot constructed for PC1 and PC2 from genome-wide SNP  
883 data (37,395 autosomal SNPs) for the BI data set of 351 individual animals. The smaller histogram  
884 plot shows the relative variance contributions for the first 10 PCs.

## Genomic characterisation of the Kerry cattle breed

885 **FIGURE 6** | Hierarchical clustering of individual animals using genome-wide SNP data (36,621  
886 autosomal SNPs) for the EU data set of 605 individual animals. Results are shown for modelled  
887 ancestral populations  $K = 2$  to 14. The cluster numbers corresponding to the likely number of ancestral  
888 populations are highlighted with a light red overlay and the two outlier Kerry samples (KY12\_06 and  
889 KY12\_58) are indicated with red arrows.

890 **FIGURE 7** | Hierarchical clustering of individual animals using genome-wide SNP data (37,395  
891 autosomal SNPs) for the BI data set of 351 individual animals. Results are shown for modelled  
892 ancestral populations  $K = 2$  to 9. The cluster numbers corresponding to the likely number of ancestral  
893 populations are highlighted with a light red overlay and the two outlier Kerry samples (KY12\_06 and  
894 KY12\_58) are indicated with red arrows.

895 **FIGURE 8** | Genetic effective population size ( $N_e$ ) trends modelled using genome-wide SNP data.  
896 Results for the KY92 and KY12 populations are shown with seven comparator heritage and  
897 production cattle breeds.

898 **FIGURE 9** | Tukey box plots showing distribution of  $F_{ROH}$  values estimated with genome-wide SNP  
899 data for the KY92 and KY12 populations and nine comparator heritage and production cattle breeds.

900 **FIGURE 10** | Manhattan plots of composite selection signal (CSS) results for Kerry cattle ( $n = 98$ )  
901 contrasted with EU cattle ( $n = 102$ ). A) Unsmoothed results. B) Smoothed results obtained by  
902 averaging CSS of SNPs within each 1 Mb window. Red dotted line on each plot denotes the genome-  
903 wide 0.1% threshold for the empirical CSS scores. Red vertical arrows indicate selection peaks  
904 detected on BTA09, BTA12, BTA16, BTA17, BTA19 and BTA28.

## Genomic characterisation of the Kerry cattle breed

905 **Table 1:** Cattle breed/population samples used for the present study

| Breed/population      | Code | Data set | Breed purpose      | Country of origin    | Source  |
|-----------------------|------|----------|--------------------|----------------------|---------|
| Angus                 | ANGU | BI/EU    | Beef               | Scotland             | 1, 2    |
| Belted Galloway       | BGAL | BI       | Beef               | Scotland             | 2       |
| British Shorthorn     | BSHN | BI/EU    | Dual purpose       | England              | 2       |
| Brown Swiss           | BRSW | EU       | Dairy              | Switzerland          | 1, 2, 3 |
| Charolais             | CHAR | EU       | Beef               | France               | 1, 2, 3 |
| Devon                 | DEVN | BI       | Beef               | England              | 2       |
| Dexter                | DXTR | BI       | Dual purpose       | Ireland              | 2       |
| English Longhorn      | ELHN | BI       | Beef               | England              | 2       |
| Finnish Ayrshire      | FAYR | BI/EU    | Dairy              | Scotland/Finland     | 2       |
| Galloway              | GALL | BI       | Beef               | Scotland             | 2       |
| Gelbvieh              | GELB | EU       | Dual purpose       | Germany              | 2, 4    |
| Guernsey              | GNSY | BI/EU    | Dairy              | Channel Islands      | 1, 2    |
| Hereford              | HRFD | BI/EU    | Beef               | England              | 1, 2    |
| Holstein              | HOLS | EU       | Dairy              | The Netherlands      | 1, 2, 5 |
| Jersey                | JRSY | BI/EU    | Dairy              | Channel Islands      | 1, 2, 3 |
| Kerry sampled 1991/92 | KY92 | BI/EU    | Dairy              | Ireland              | Current |
| Kerry sampled 2011/12 | KY12 | BI/EU    | Dairy              | Ireland              | Current |
| Limousin              | LIMS | EU       | Beef/draft         | France               | 1, 2    |
| Lincoln Red           | LNCR | BI       | Beef               | England              | 2       |
| Montbeliarde          | MONT | EU       | Dairy              | France               | 2, 5    |
| N'Dama                | NDAM | ---      | Dual purpose       | Guinea (West Africa) | 1       |
| Norwegian Red         | NRED | EU       | Dairy              | Norway               | 1       |
| Piedmontese           | PDMT | EU       | Dual purpose       | Italy                | 1, 2    |
| Red Angus             | RANG | BI/EU    | Beef               | Scotland             | 1       |
| Red Poll              | REDP | BI       | Beef               | England              | 2       |
| Romagnola             | ROMG | EU       | Beef/draft         | Italy                | 1       |
| Scottish Highland     | SCHL | BI       | Beef               | Scotland             | 2       |
| Simmental             | SIMM | EU       | Dual purpose/draft | Switzerland          | 2, 4    |
| South Devon           | SDEV | BI       | Beef               | England              | 2       |
| Sussex                | SUSX | BI       | Beef/draft         | England              | 2       |
| Welsh Black           | WBLK | BI       | Dual purpose       | Wales                | 2       |
| White Park            | WHPK | BI       | Dual purpose/draft | England              | 2       |

906 <sup>1</sup> Gibbs et al. (2009); <sup>2</sup> Decker et al. (2009); <sup>3</sup> Gautier et al. (2010); <sup>4</sup> Matukumalli et al. (2009); <sup>5</sup> Flori et al. (2009)

907

**Genomic characterisation of the Kerry cattle breed**

908 **Table 2:** Breed/population sample size, observed heterozygosity and SNP filtering information

| <b>Breed/population</b> | <b>Code</b> | <b>Data set</b> | <b>Sample size (<i>n</i>)<br/>post-filtering</b> | <b>Observed<br/>heterozygosity<br/><i>H<sub>o</sub></i></b> | <b>No. SNPs<br/><i>N<sub>e</sub></i><br/>modelling</b> | <b>No. SNPs<br/>genomic<br/>inbreeding</b> |
|-------------------------|-------------|-----------------|--------------------------------------------------|-------------------------------------------------------------|--------------------------------------------------------|--------------------------------------------|
| Angus                   | ANGU        | BI/EU           | 72                                               | 0.3048                                                      | 31,413                                                 | 34,531                                     |
| Belted Galloway         | BGAL        | BI              | 4                                                | 0.2902                                                      | 25,997                                                 | 25,997                                     |
| British Shorthorn       | BSHN        | BI/EU           | 10                                               | 0.2549                                                      | 29,038                                                 | 29,038                                     |
| Brown Swiss             | BRSW        | EU              | 31                                               | 0.28943                                                     | ---                                                    | ---                                        |
| Charolais               | CHAR        | EU              | 48                                               | 0.3209                                                      | ---                                                    | ---                                        |
| Devon                   | DEVN        | BI              | 4                                                | 0.2859                                                      | ---                                                    | ---                                        |
| Dexter                  | DXTR        | BI              | 4                                                | 0.2458                                                      | 24,753                                                 | 24,753                                     |
| English Longhorn        | ELHN        | BI              | 3                                                | 0.2232                                                      | ---                                                    | ---                                        |
| Finnish Ayrshire        | FAYR        | BI/EU           | 7                                                | 0.3064                                                      | ---                                                    | ---                                        |
| Galloway                | GALL        | BI              | 4                                                | 0.2942                                                      | ---                                                    | ---                                        |
| Gelbvieh                | GELB        | EU              | 8                                                | 0.3125                                                      | ---                                                    | ---                                        |
| Guernsey                | GNSY        | BI/EU           | 19                                               | 0.2764                                                      | ---                                                    | 38,437                                     |
| Hereford                | HRFD        | BI/EU           | 35                                               | 0.2964                                                      | ---                                                    | 35,156                                     |
| Holstein                | HOLS        | EU              | 70                                               | 0.3192                                                      | 36,152                                                 | 38,717                                     |
| Jersey                  | JRSY        | BI/EU           | 44                                               | 0.2718                                                      | 31,358                                                 | 35,990                                     |
| Kerry sampled 1991/92   | KY92        | BI/EU           | 36                                               | 0.2965                                                      | 37,556                                                 | 40,801                                     |
| Kerry sampled 2011/12   | KY12        | BI/EU           | 62                                               | 0.3042                                                      | 36,428                                                 | 40,730                                     |
| Limousin                | LIMS        | EU              | 45                                               | 0.3122                                                      | ---                                                    | ---                                        |
| Lincoln Red             | LNCR        | BI              | 7                                                | 0.2789                                                      | 26 350                                                 | 26,350                                     |
| Montbeliarde            | MONT        | EU              | 31                                               | 0.3019                                                      | ---                                                    | ---                                        |
| N'Dama                  | NDAM        | ---             | 22                                               | 0.2158                                                      | ---                                                    | ---                                        |
| Norwegian Red           | NRED        | EU              | 20                                               | 0.3190                                                      | ---                                                    | ---                                        |
| Piedmontese             | PDMT        | EU              | 23                                               | 0.3240                                                      | ---                                                    | ---                                        |
| Red Angus               | RANG        | BI/EU           | 14                                               | 0.3092                                                      | ---                                                    | ---                                        |
| Red Poll                | REDP        | BI              | 5                                                | 0.2905                                                      | ---                                                    | ---                                        |
| Romagnola               | ROMG        | EU              | 21                                               | 0.2943                                                      | ---                                                    | ---                                        |
| Scottish Highland       | SCHL        | BI              | 8                                                | 0.2823                                                      | ---                                                    | ---                                        |
| Simmental               | SIMM        | EU              | 9                                                | 0.3136                                                      | ---                                                    | ---                                        |
| South Devon             | SDEV        | BI              | 3                                                | 0.3070                                                      | ---                                                    | ---                                        |
| Sussex                  | SUSX        | BI              | 4                                                | 0.2792                                                      | ---                                                    | ---                                        |
| Welsh Black             | WBLK        | BI              | 2                                                | 0.3203                                                      | ---                                                    | ---                                        |
| White Park              | WHPK        | BI              | 4                                                | 0.2270                                                      | ---                                                    | ---                                        |

909

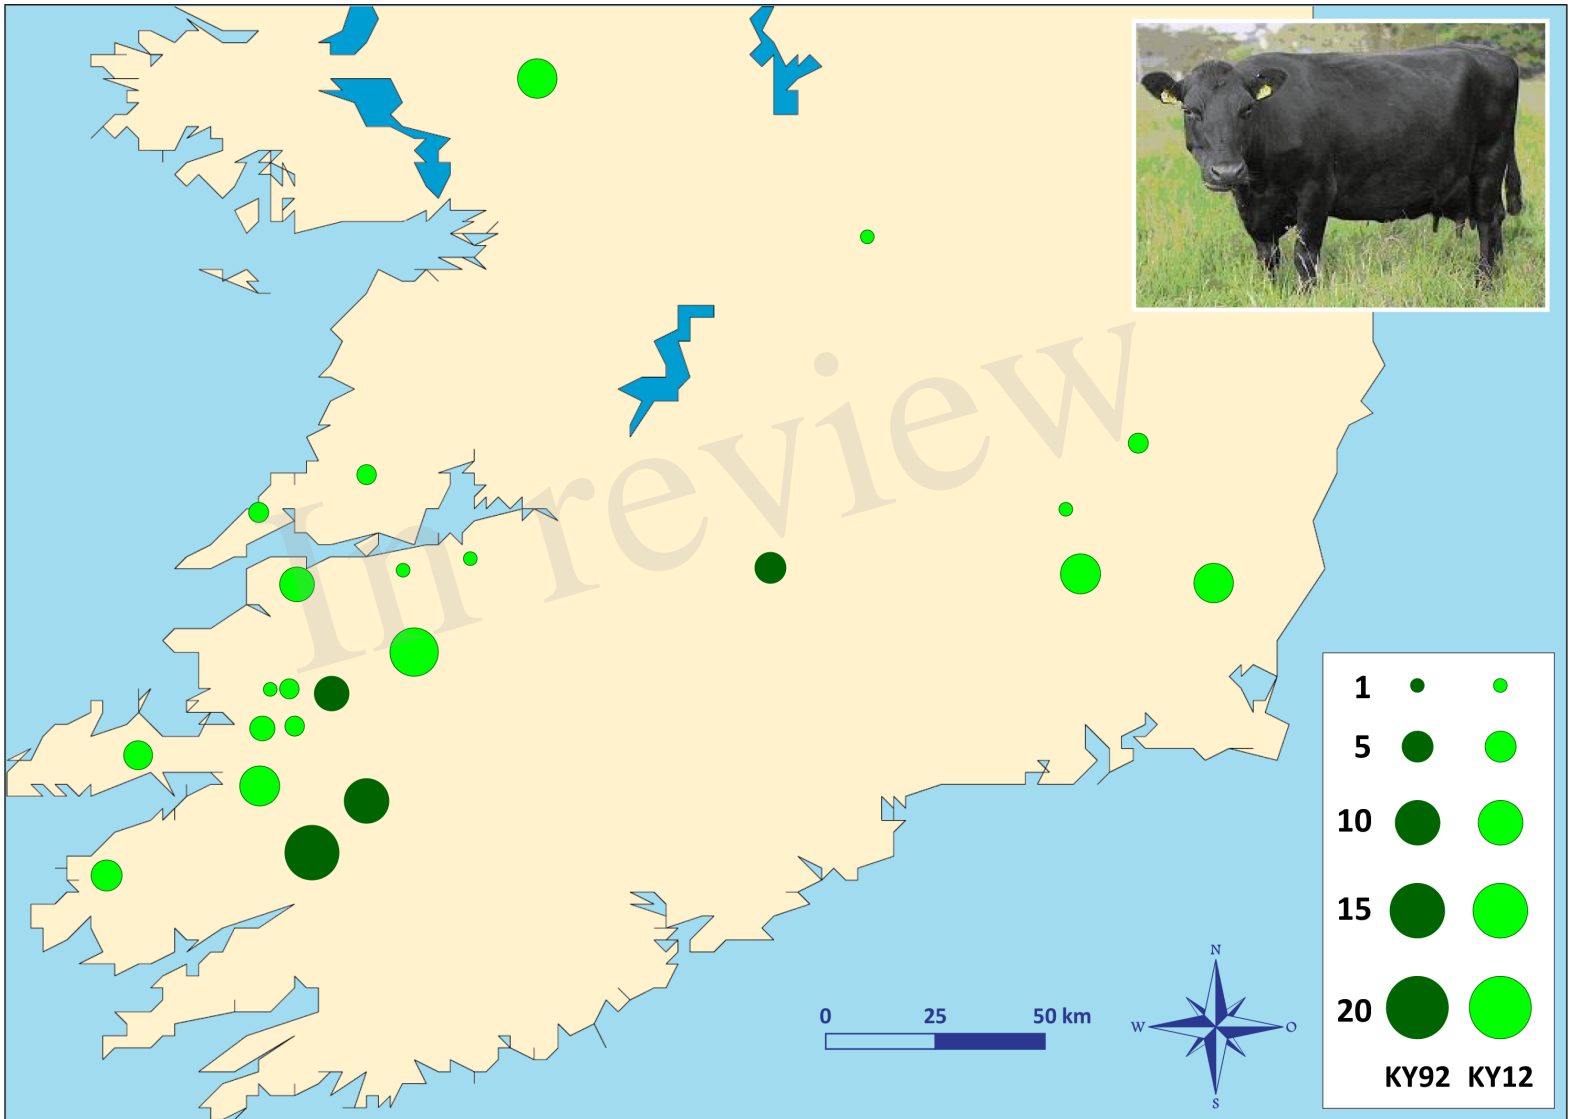

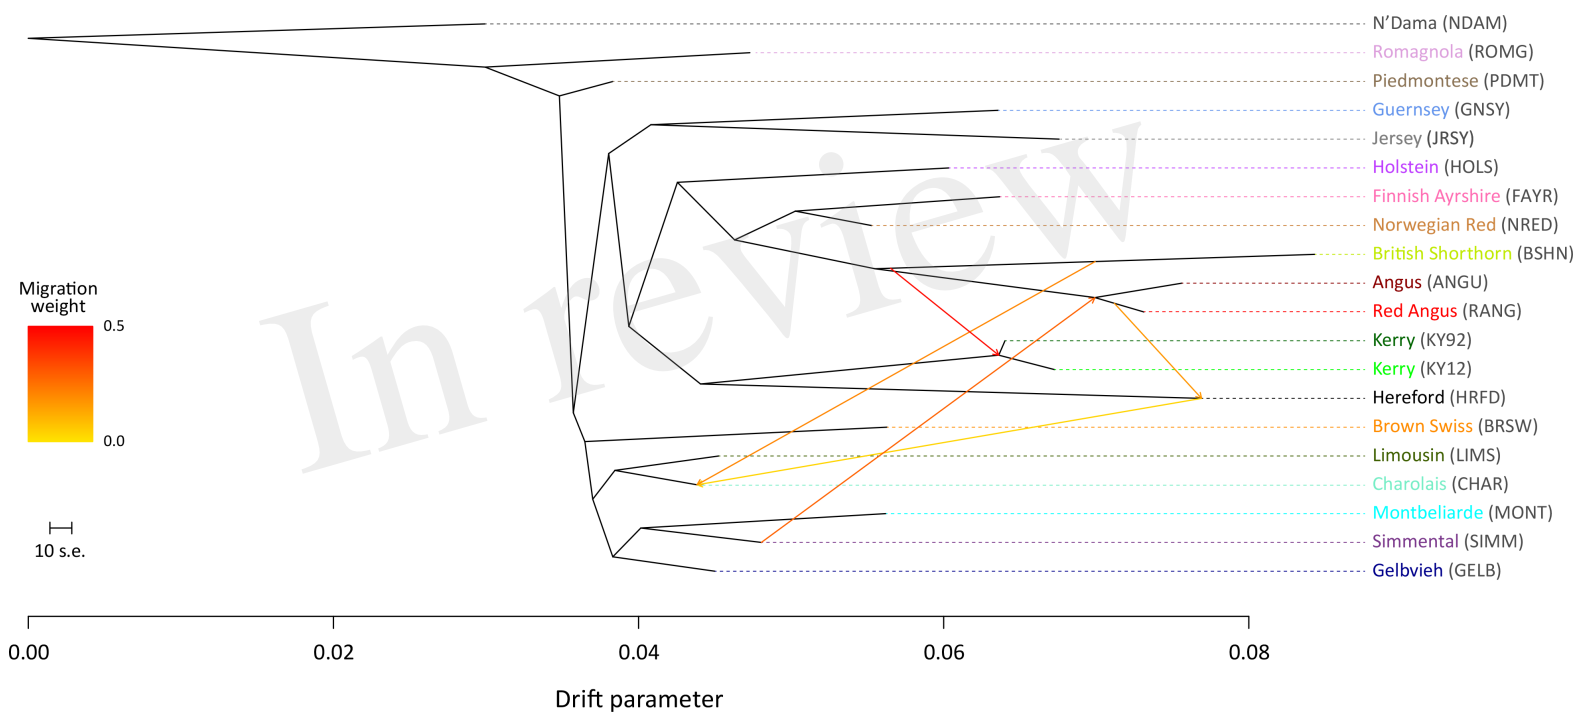

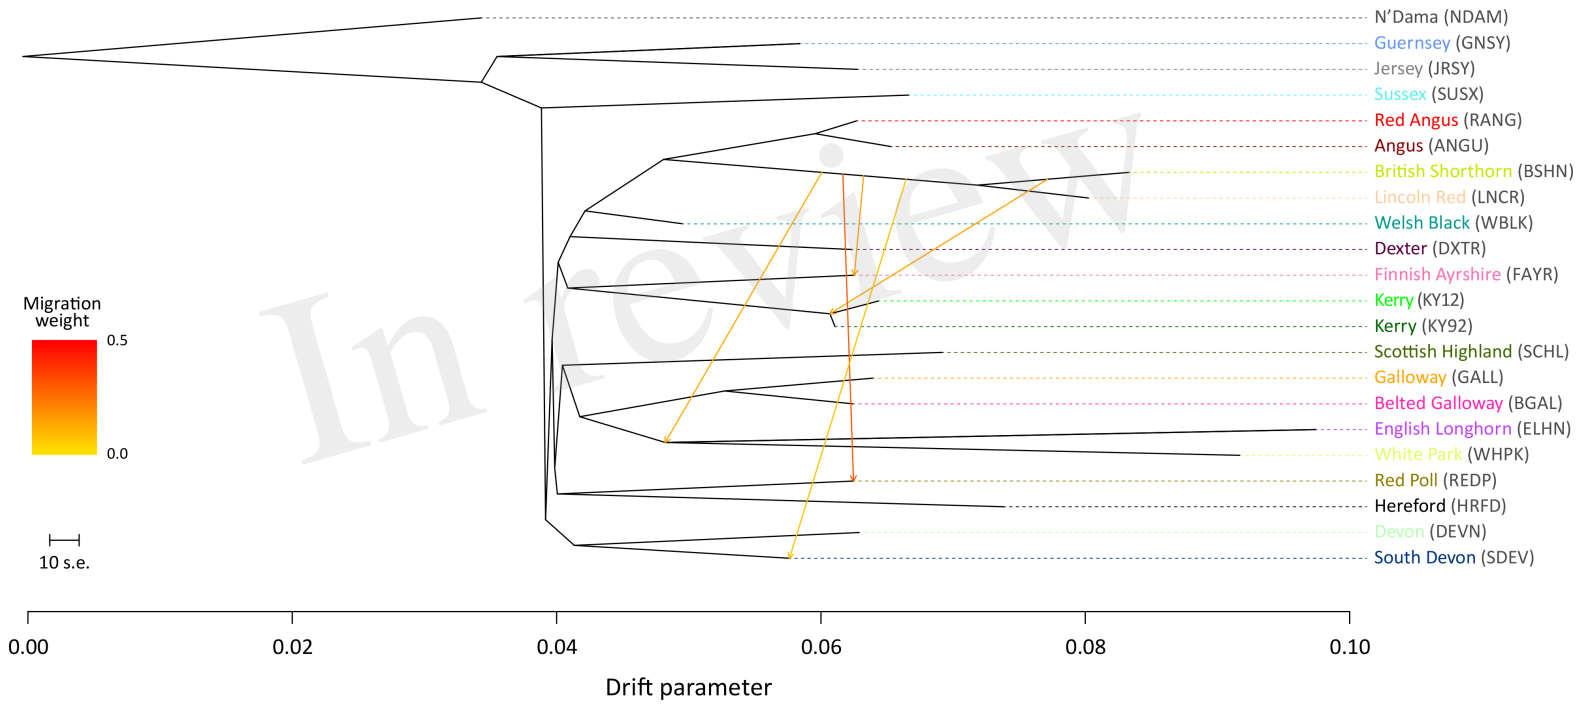

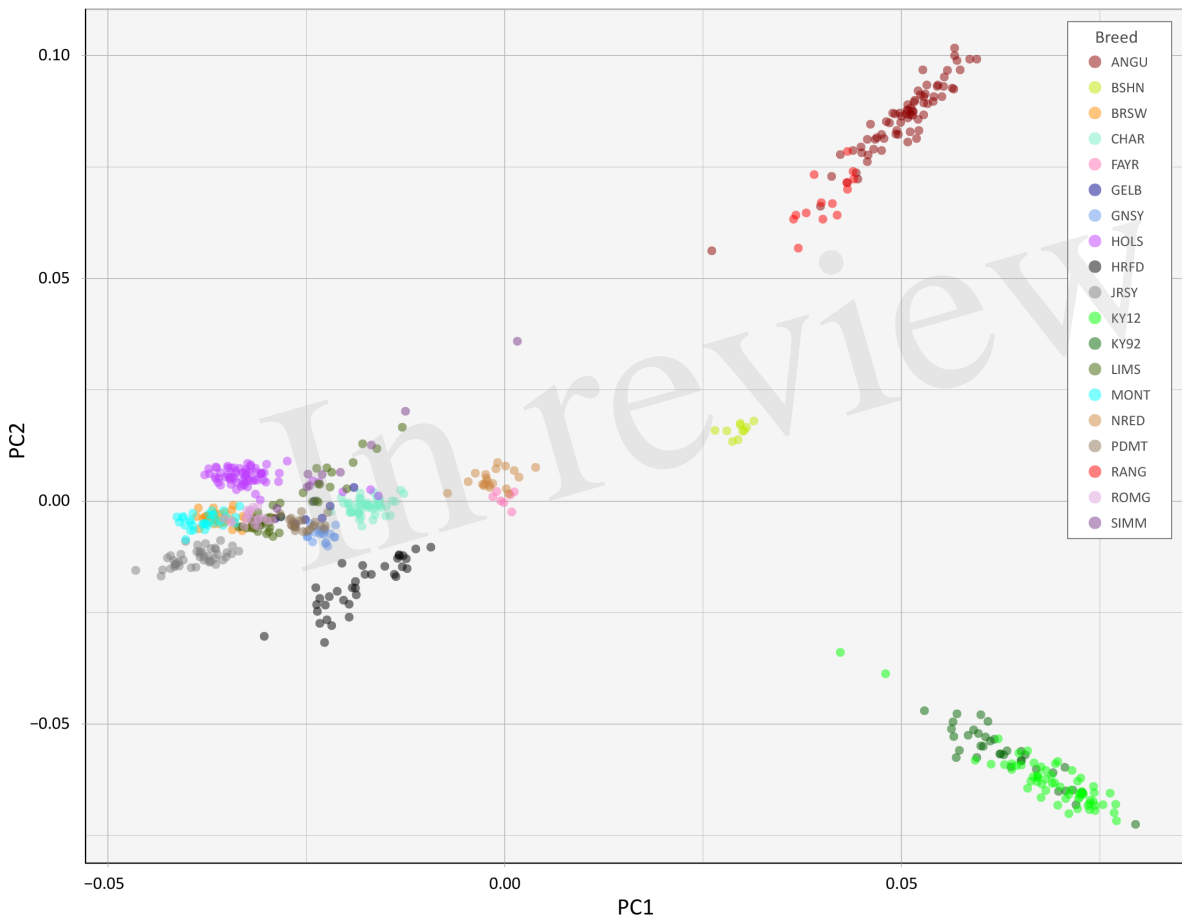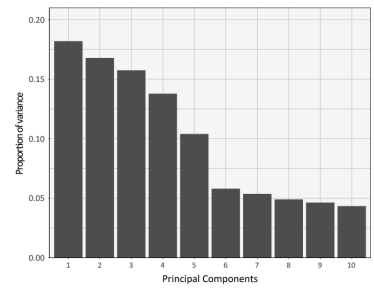



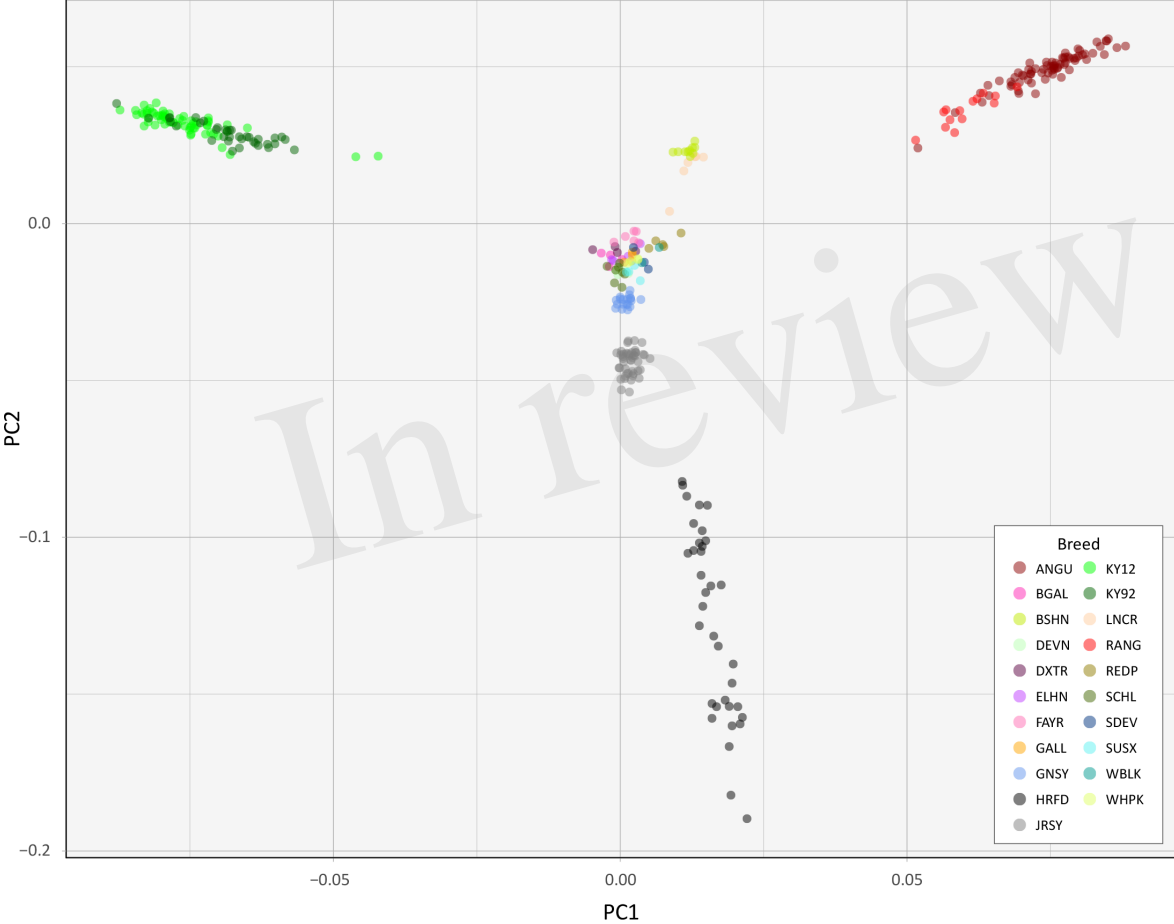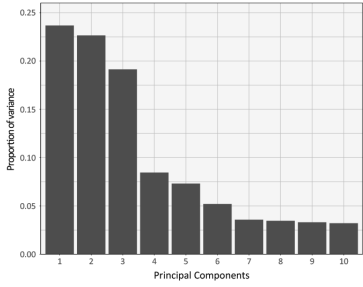

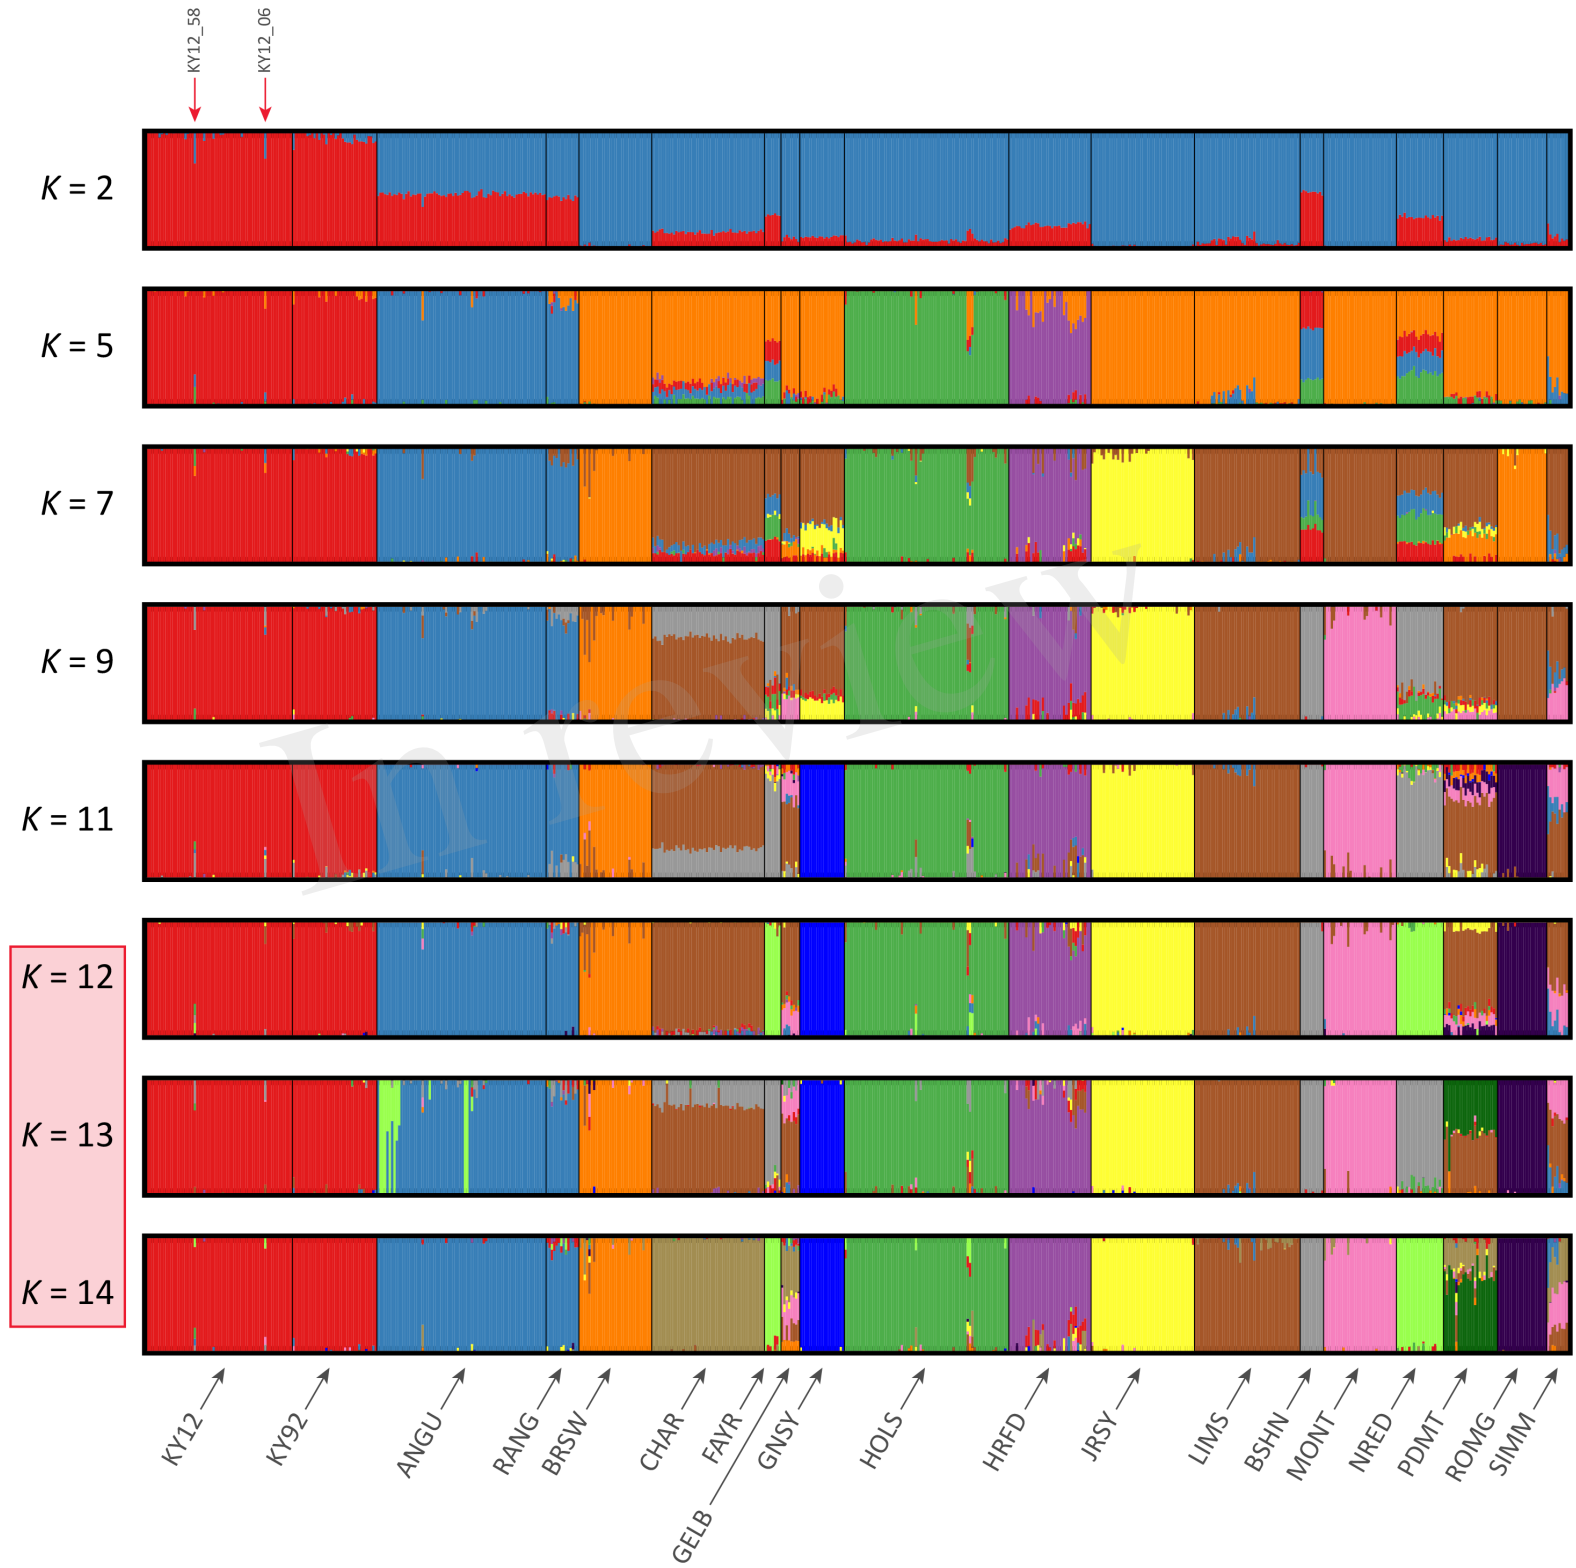

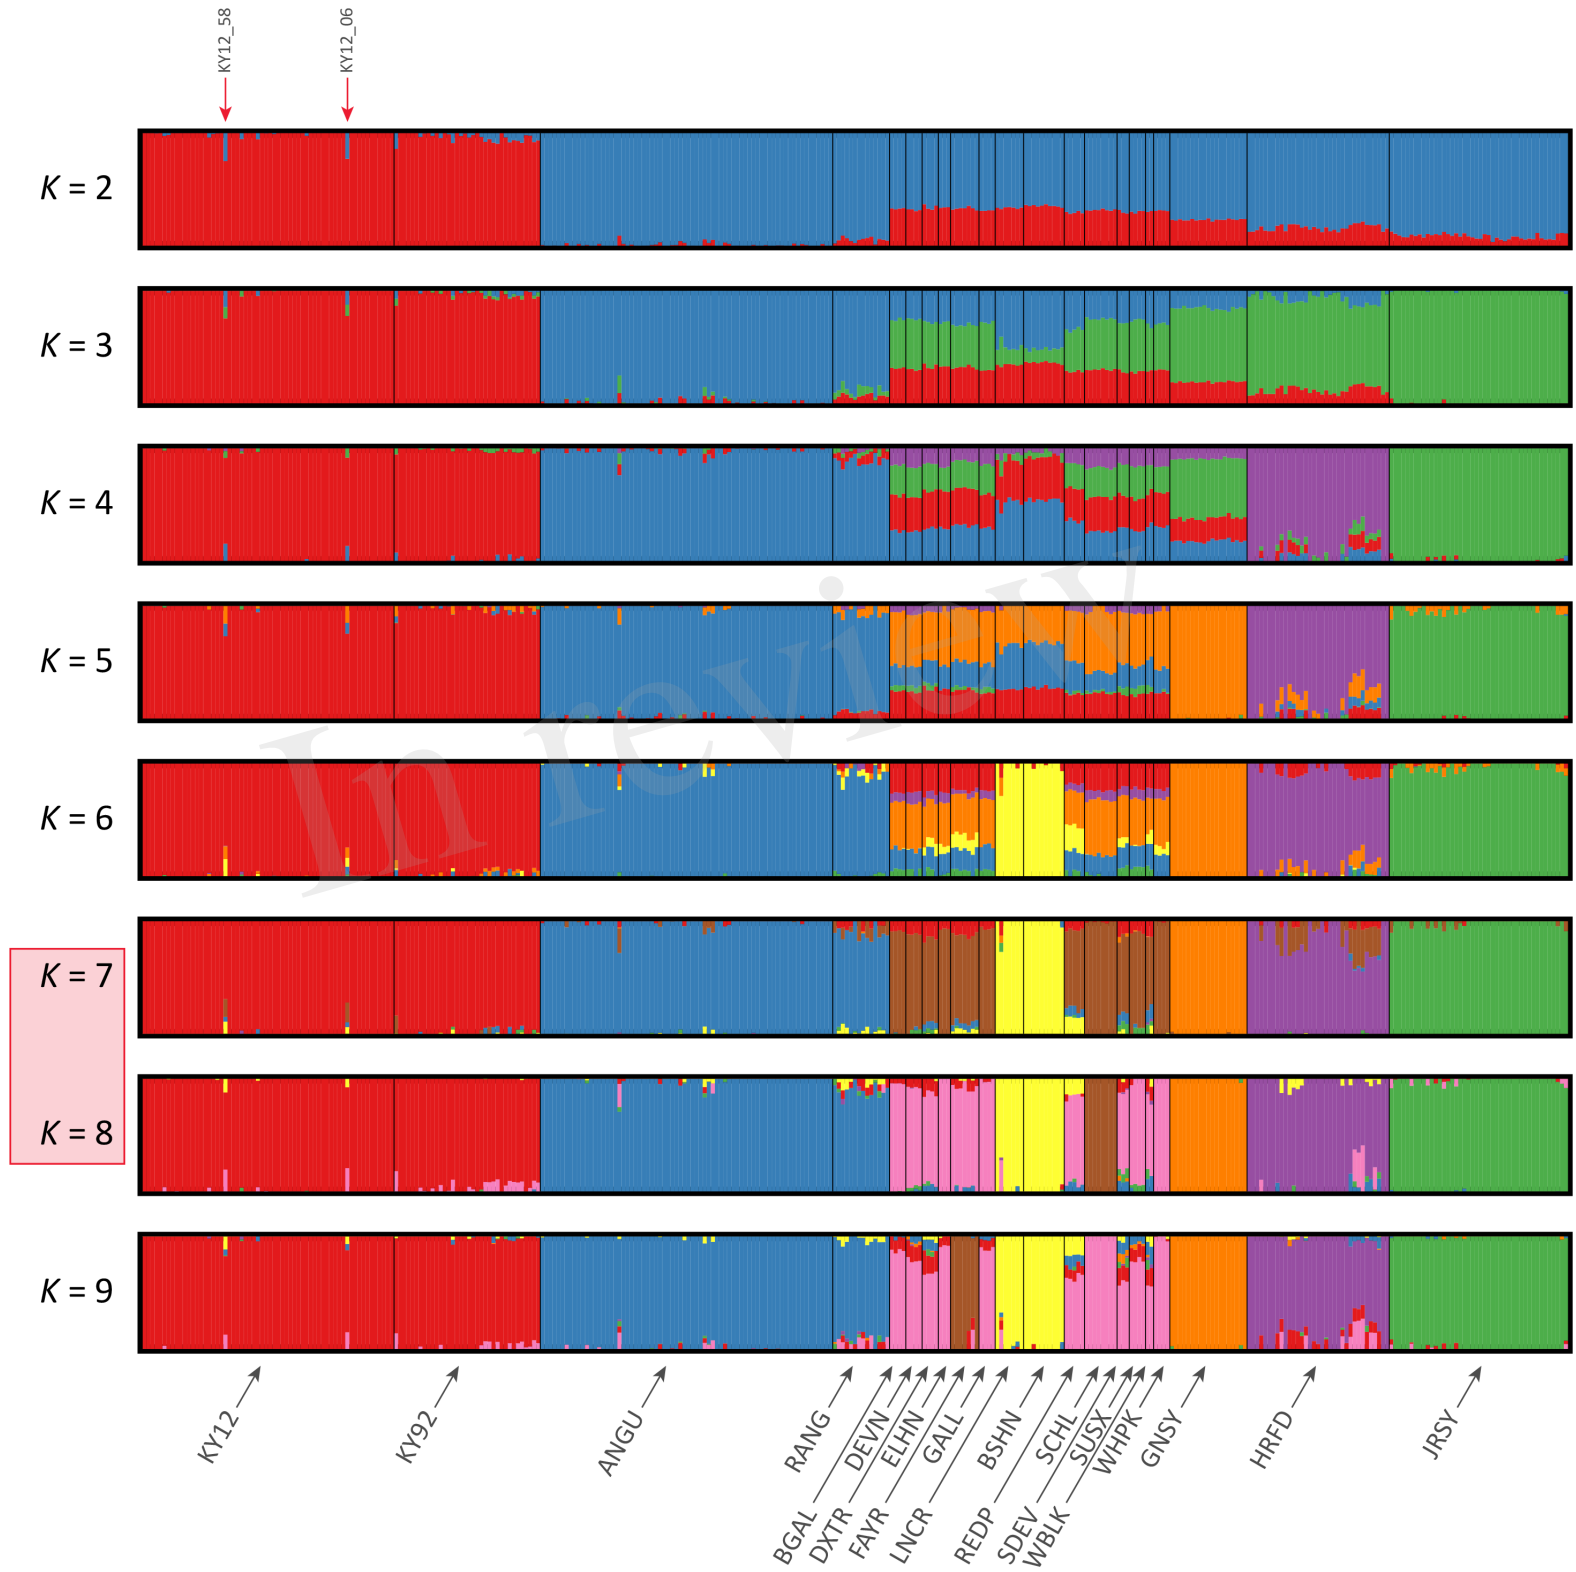

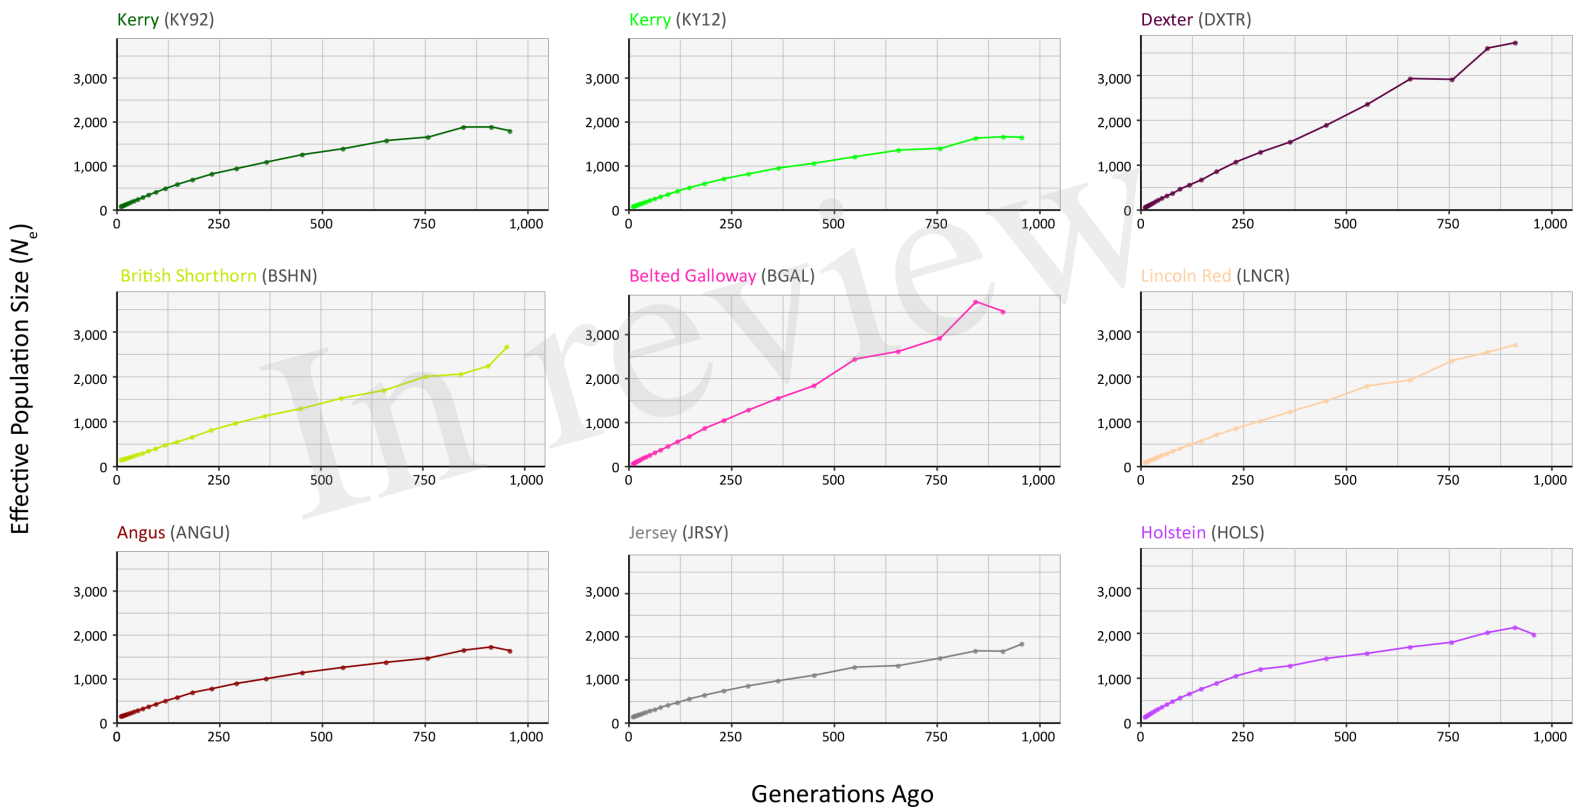

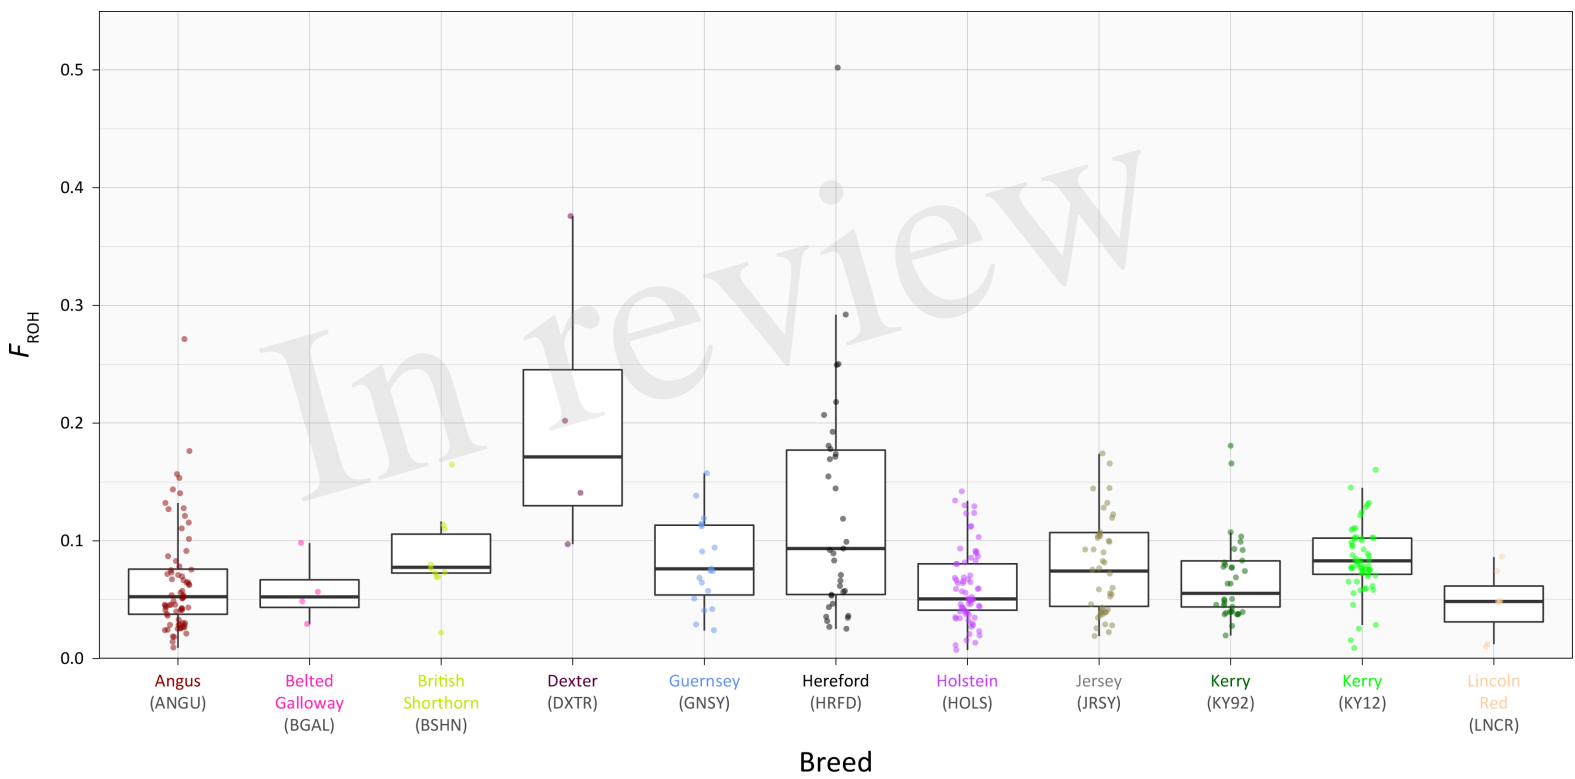

**A**

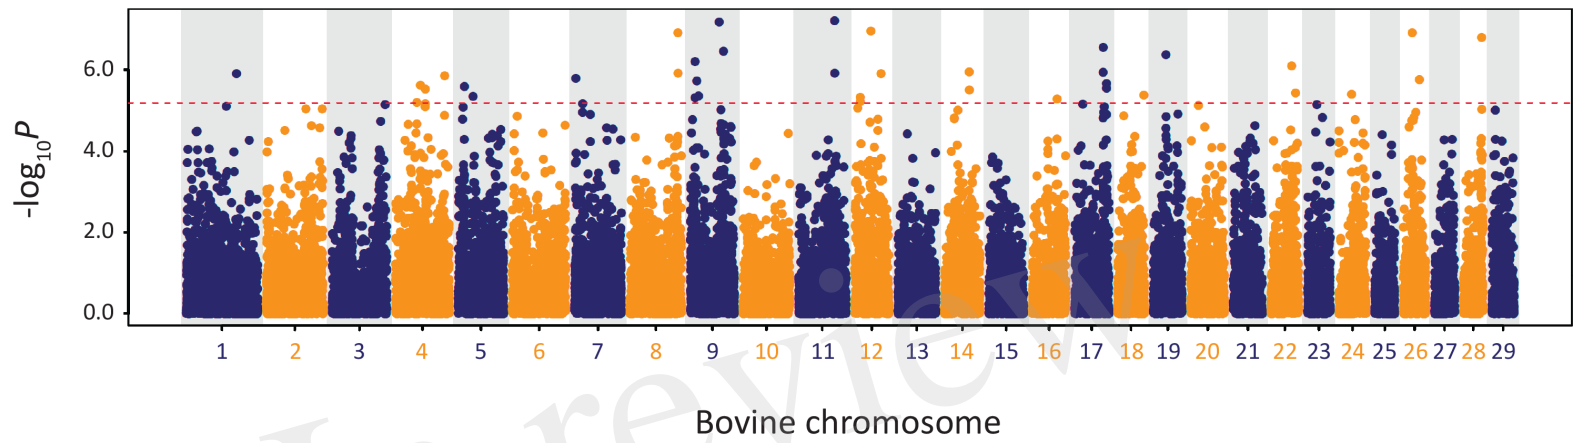

**B**

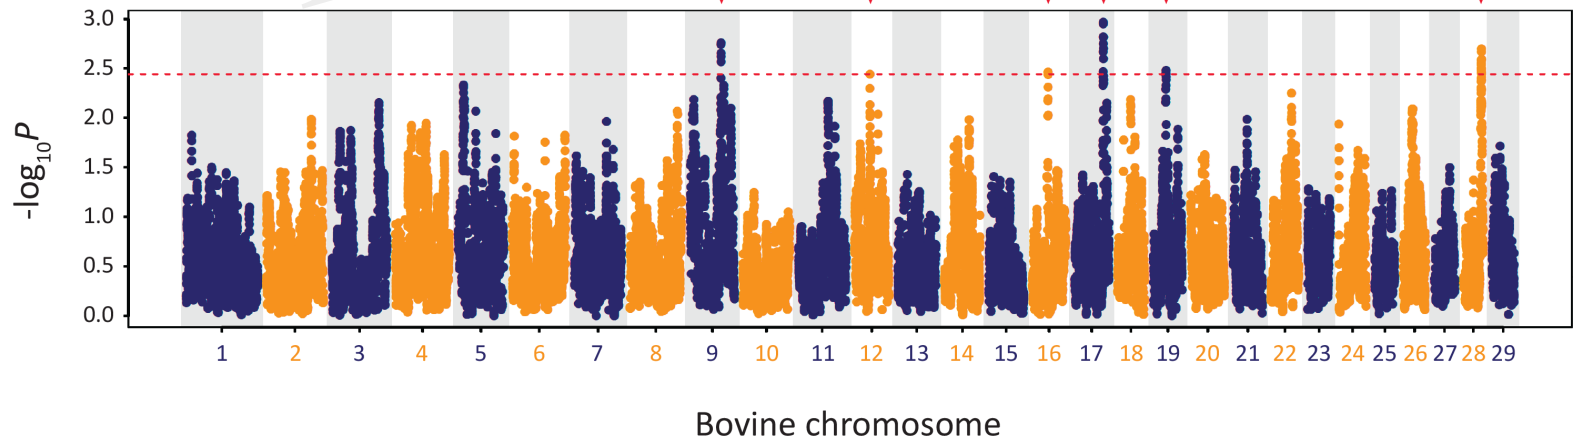

Source: https://www.biorxiv.org/content/10.1101/210229v1.full.pdf
